# Supplementary material for: Facile transmetallation of [SbIII(DOTA)]− renders it unsuitable for medical applications
Source: PubMed Central journal article supplement (PMC8981601; doi:10.1039/d2ra00642a), 2022-02-16
Supplement: RA-012-D2RA00642A-s001.pdf [file RA-012-D2RA00642A-s001.pdf]

Supplementary Information

## Facile Transmetallation of [Sb<sup>III</sup>(DOTA)]<sup>-</sup> renders it unsuitable for medical applications

Catherine Chen, Charlotte Sommer, Helge Thisgaard, Vickie McKee, and Christine J. McKenzie

### Index

|                                                                                                                                                      |    |
|------------------------------------------------------------------------------------------------------------------------------------------------------|----|
| 1. Mass spectrometry .....                                                                                                                           | 3  |
| <b>Figure S1.</b> Expanded ESI mass spectrum of Na[Sb(DOTA)]·4H <sub>2</sub> O .....                                                                 | 3  |
| <b>Figure S2.</b> ESI mass spectra of Na[Bi(DOTA)]·4H <sub>2</sub> O .....                                                                           | 3  |
| <b>Figure S3.</b> ESI mass spectra of Na[Y(DOTA)] .....                                                                                              | 4  |
| <b>Figure S4.</b> ESI mass spectra of [H <sub>4</sub> DOTA] incubated with M <sup>3+</sup> (Bi, Sb, and Y) and M <sup>2+</sup> (Ca, Mg, Zn) ions.... | 4  |
| <b>Figure S5.</b> ESI Spectra of competition study between Na[Sb(DOTA)]·4H <sub>2</sub> O and M <sup>3+</sup> (M=Bi and Y) metal ions. ....          | 5  |
| <b>Figure S6.</b> ESI Spectra of competition study between Na[Sb(DOTA)]·4H <sub>2</sub> O and Sc <sup>3+</sup> ions. ....                            | 6  |
| <b>Figure S7.</b> ESI Spectra of competition study between Na[Sb(DOTA)]·4H <sub>2</sub> O and Zn <sup>2+</sup> ions. ....                            | 7  |
| <b>Figure S8.</b> ESI Spectra of competition study between Na[Sb(DOTA)]·4H <sub>2</sub> O and Ca <sup>2+</sup> ions. ....                            | 8  |
| <b>Figure S9.</b> ESI Spectra of competition study between Na[Sb(DOTA)]·4H <sub>2</sub> O and Mg <sup>2+</sup> ions.....                             | 9  |
| <b>Figure 10.</b> ESI Spectra of competition study between Na[Y(DOTA)]·4H <sub>2</sub> O and M <sup>3+</sup> (M= Bi and Sb) ions.10                  |    |
| <b>Figure 11.</b> ESI Spectra of competition study between Na[Y(DOTA)]·4H <sub>2</sub> O and M <sup>2+</sup> (M= Ca, Mg and Zn) ions. ....           | 11 |
| <b>Figure 12.</b> ESI Spectra of competition study between Na[Bi(DOTA)]·4H <sub>2</sub> O and M <sup>3+</sup> (M= Sb and Y) ions.12                  |    |
| <b>Figure 13.</b> ESI Spectra of competition study between Na[Bi(DOTA)]·4H <sub>2</sub> O and M <sup>2+</sup> (M= Ca, Mg and Zn) ions. ....          | 13 |
| 2. PXRD .....                                                                                                                                        | 14 |
| <b>Figure S14.</b> PXRD of (a) [H <sub>3</sub> O][Bi(DOTA)]·H <sub>2</sub> O and (b) Na[Bi(DOTA)]·4H <sub>2</sub> O .....                            | 14 |
| <b>Figure S15.</b> PXRD of Na[Sb(DOTA)]·4H <sub>2</sub> O .....                                                                                      | 14 |
| 3. Crystallography.....                                                                                                                              | 15 |
| [H <sub>6</sub> DOTA]Cl <sub>2</sub> ·4H <sub>2</sub> O·DMSO: .....                                                                                  | 15 |
| <b>Figure S16.</b> H-bonding network in [H <sub>6</sub> DOTA]Cl <sub>2</sub> ·4H <sub>2</sub> O·DMSO.....                                            | 15 |
| <b>Figure S17.</b> Packing diagram for [H <sub>6</sub> DOTA]Cl <sub>2</sub> ·4H <sub>2</sub> O·DMSO viewed down the c axis.....                      | 15 |
| <b>Figure S18.</b> Overlays of the DOTA .....                                                                                                        | 16 |
| <b>Table S1.</b> Hydrogen-bond geometry (Å, °) for [H <sub>6</sub> DOTA]Cl <sub>2</sub> ·4H <sub>2</sub> O·DMSO.....                                 | 16 |
| Na[Sb(DOTA)]·4H <sub>2</sub> O and Na[Bi(DOTA)]·4H <sub>2</sub> O.....                                                                               | 18 |
| <b>Table S2.</b> Lattice type analyses for Na[Sb(DOTA)]·4H <sub>2</sub> O and Na[Bi(DOTA)]·4H <sub>2</sub> O.....                                    | 18 |
| <b>Figure S19.</b> Asymmetric unit of Na[Sb(DOTA)]·4H <sub>2</sub> O,.....                                                                           | 19 |

|                                                                                                                                                                                                                                    |    |
|------------------------------------------------------------------------------------------------------------------------------------------------------------------------------------------------------------------------------------|----|
| <b>Figure S20.</b> Packing diagram of Na[Sb(DOTA)]·4H <sub>2</sub> O viewed down the b axis, showing OH---O H bonds                                                                                                                | 19 |
| <b>Figure S21.</b> Packing diagram of Na[Sb(DOTA)]·4H <sub>2</sub> O viewed down the b axis, showing CH---O H bonds                                                                                                                | 20 |
| <b>Figure S22.</b> Asymmetric unit of Na[Bi(DOTA)]·4H <sub>2</sub> O                                                                                                                                                               | 20 |
| <b>Figure S23.</b> [Bi(DOTA)] <sup>-</sup> (top) and [(Na(H <sub>2</sub> O) <sub>4</sub> ) <sub>2</sub> Bi(DOTA)] <sup>+</sup> (bottom)                                                                                            | 21 |
| <b>Table S3.</b> Hydrogen-bond geometry (Å, °) for Na[Sb(DOTA)]·4H <sub>2</sub> O                                                                                                                                                  | 22 |
| <b>Table S4.</b> Hydrogen-bond geometry (Å, °) for Na[Bi(DOTA)]·4H <sub>2</sub> O                                                                                                                                                  | 23 |
| [H <sub>3</sub> O][Bi(DOTA)]·H <sub>2</sub> O                                                                                                                                                                                      | 24 |
| <b>Figure S24.</b> [H <sub>3</sub> O][Bi(DOTA)]·H <sub>2</sub> O showing disorder in the carboxylate groups and the H <sub>3</sub> O <sup>+</sup> /H <sub>2</sub> O                                                                | 25 |
| <b>Figure S25.</b> Packing diagram for [H <sub>3</sub> O][Bi(DOTA)]·H <sub>2</sub> O viewed down the c axis. Hydrogen bonds                                                                                                        | 25 |
| <b>Table S5.</b> Hydrogen-bond geometry (Å, °) for [H <sub>3</sub> O][Bi(DOTA)]·H <sub>2</sub> O                                                                                                                                   | 26 |
| <b>Figure S26.</b> Overlay of the structures of [Sc(DOTA)] <sup>-</sup> (pale blue from LUQCIJ) and [Sb(DOTA)] <sup>-</sup> (purple)                                                                                               | 26 |
| <b>Table S6.</b> Expanded version of table 1 with selected bond lengths (Å) for Na[Sb(DOTA)]·4H <sub>2</sub> O and Na[Bi(DOTA)]·4H <sub>2</sub> O and structures from literature containing [Sc(DOTA)] <sup>-</sup> . <sup>a</sup> | 27 |

## 1. Mass spectrometry

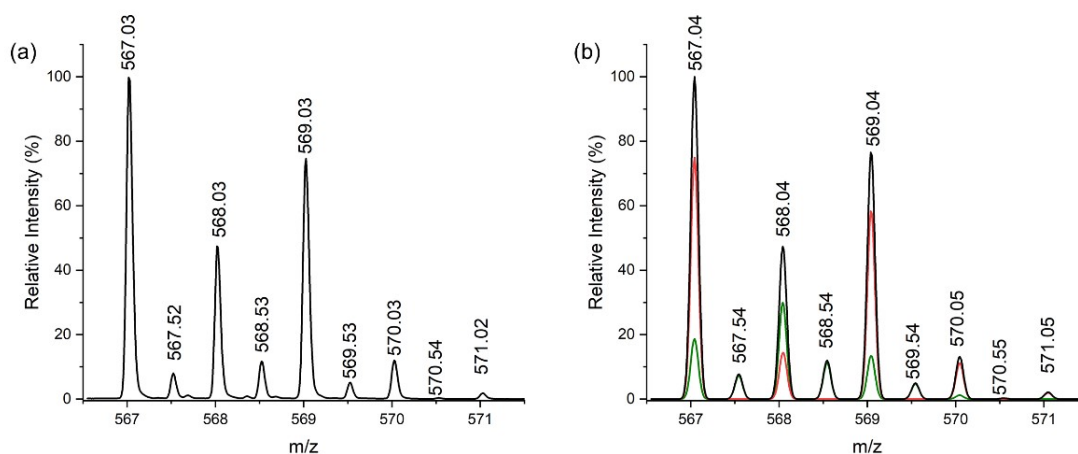

**Figure S1.** (a) Expanded section of ESI mass spectra for Na[Sb(DOTA)]·4H<sub>2</sub>O recorded in positive mode (Figure 2(a)) showing the isotope pattern for peak m/z 567.03 and (b) the calculated isotope patterns for [Na<sub>2</sub>Sb(DOTA)]<sup>+</sup> (red), {[Na<sub>2</sub>Sb(DOTA)]<sub>2</sub>}<sup>2+</sup> (blue) and the corresponding combined spectra of [Na<sub>2</sub>Sb(DOTA)]<sup>+</sup> and {[Na<sub>2</sub>Sb(DOTA)]<sub>2</sub>}<sup>2+</sup> (black).

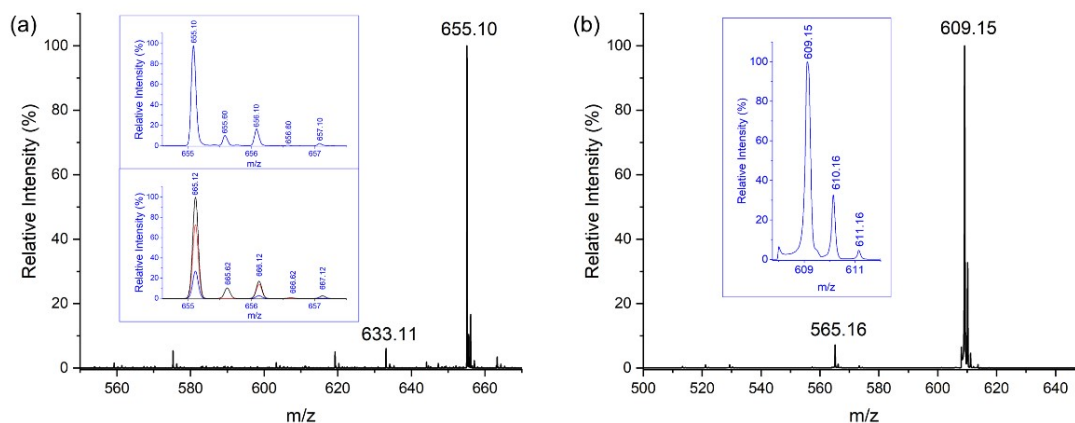

**Figure S2.** ESI mass spectra of Na[Bi(DOTA)]·4H<sub>2</sub>O. in water: acetonitrile (1:50) recorded in (a) positive mode show peaks corresponding to [NaHBi(DOTA)]<sup>+</sup> (m/z 633.11) and [Na<sub>2</sub>Bi(DOTA)]<sup>+</sup> overlaid with a smaller fraction of {[Na<sub>2</sub>Bi(DOTA)]<sub>2</sub>}<sup>2+</sup> (m/z 655.10) (expanded in inset: found spectra (top) compared to the fitted spectra (bottom)), and (b) negative mode showing peaks corresponding to {[Bi(DOTA)]-CO<sub>2</sub>}<sup>-</sup> (m/z 565.16) and [Bi(DOTA)]<sup>-</sup> (m/z 609.15) (expanded in inset).

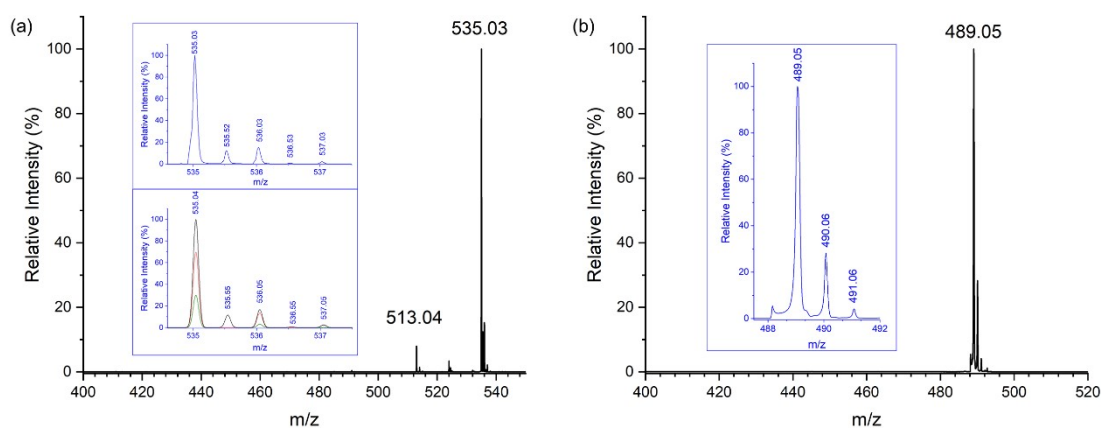

**Figure S3.** ESI mass spectra of Na[Y(DOTA)·4H<sub>2</sub>O] in water: acetonitrile (1:50) recorded in **(a)** positive mode show peaks corresponding to [NaHY(DOTA)]<sup>+</sup> (m/z 513.04) and [Na<sub>2</sub>Bi(DOTA)]<sup>+</sup> overlaid with a smaller fraction of {[Na<sub>2</sub>Y(DOTA)]<sub>2</sub>}<sup>2+</sup> (m/z 535.03) (expanded in inset: found spectra (top) compared to the fitted spectra (bottom)), and **(b)** negative mode showing one peak corresponding to [Y(DOTA)]<sup>-</sup> (m/z 489.05) (expanded in inset).

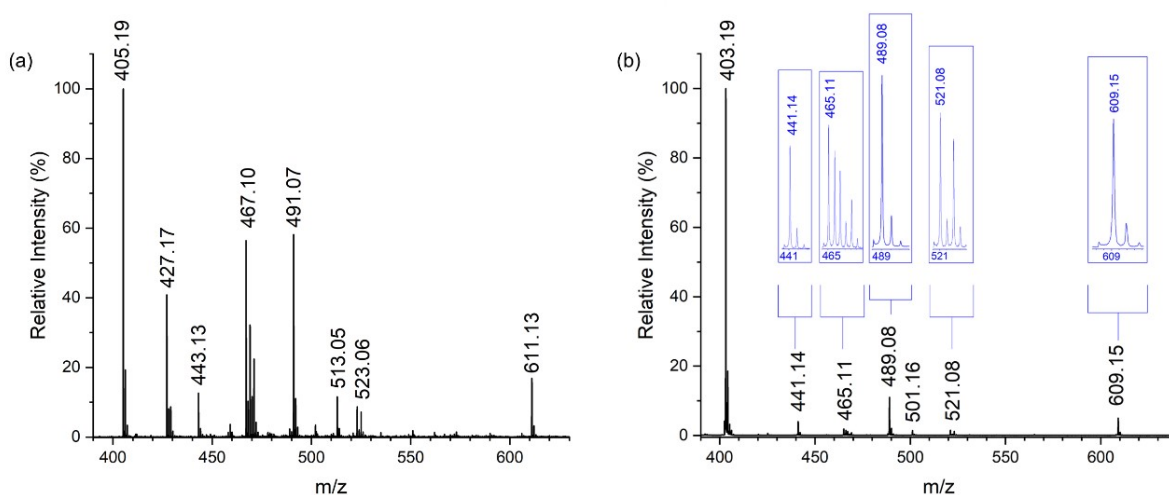

**Figure S4.** ESI mass spectra of samples containing acetonitrile: water (9:1). Samples were diluted from aqueous solutions of [H<sub>4</sub>DOTA] (1mM) incubated with Ca(NO<sub>3</sub>)<sub>2</sub>·4H<sub>2</sub>O (0.15 mM), MgCl<sub>2</sub>·6H<sub>2</sub>O (0.15 mM), ZnCl<sub>2</sub> (0.15 mM), Y(NO<sub>3</sub>)<sub>3</sub>·6H<sub>2</sub>O (0.15 mM), Bi(NO<sub>3</sub>)<sub>3</sub>·5H<sub>2</sub>O (0.15 mM), and Sb<sub>2</sub>(SO<sub>4</sub>)<sub>3</sub> (0.075 mM) for 2 hours at 298K and recorded in; **(a)** Positive mode showing peaks corresponding to [H<sub>5</sub>DOTA]<sup>+</sup> (m/z 405.19), [H<sub>3</sub>Mg(DOTA)]<sup>+</sup> (m/z 427.17), [H<sub>3</sub>Ca(DOTA)]<sup>+</sup> (m/z 443.13), [H<sub>3</sub>Zn(DOTA)]<sup>+</sup> (m/z 461.10), [H<sub>2</sub>Y(DOTA)]<sup>+</sup> (m/z 491.07), [NaHY(DOTA)]<sup>+</sup> (m/z 513.05), [H<sub>2</sub>Sb(DOTA)]<sup>+</sup> (m/z 523.06), and [H<sub>2</sub>Bi(DOTA)]<sup>+</sup> (m/z 611.13). **(b)** Negative mode showing peaks corresponding to [H<sub>3</sub>DOTA]<sup>-</sup> (m/z 403.19), [HCa(DOTA)]<sup>-</sup> (m/z 441.14), [HZn(DOTA)]<sup>-</sup> (m/z 465.11), [Y(DOTA)]<sup>-</sup> (m/z 489.08), [Sb(DOTA)]<sup>-</sup> (m/z 521.08), and [Bi(DOTA)]<sup>-</sup> (m/z 609.15).

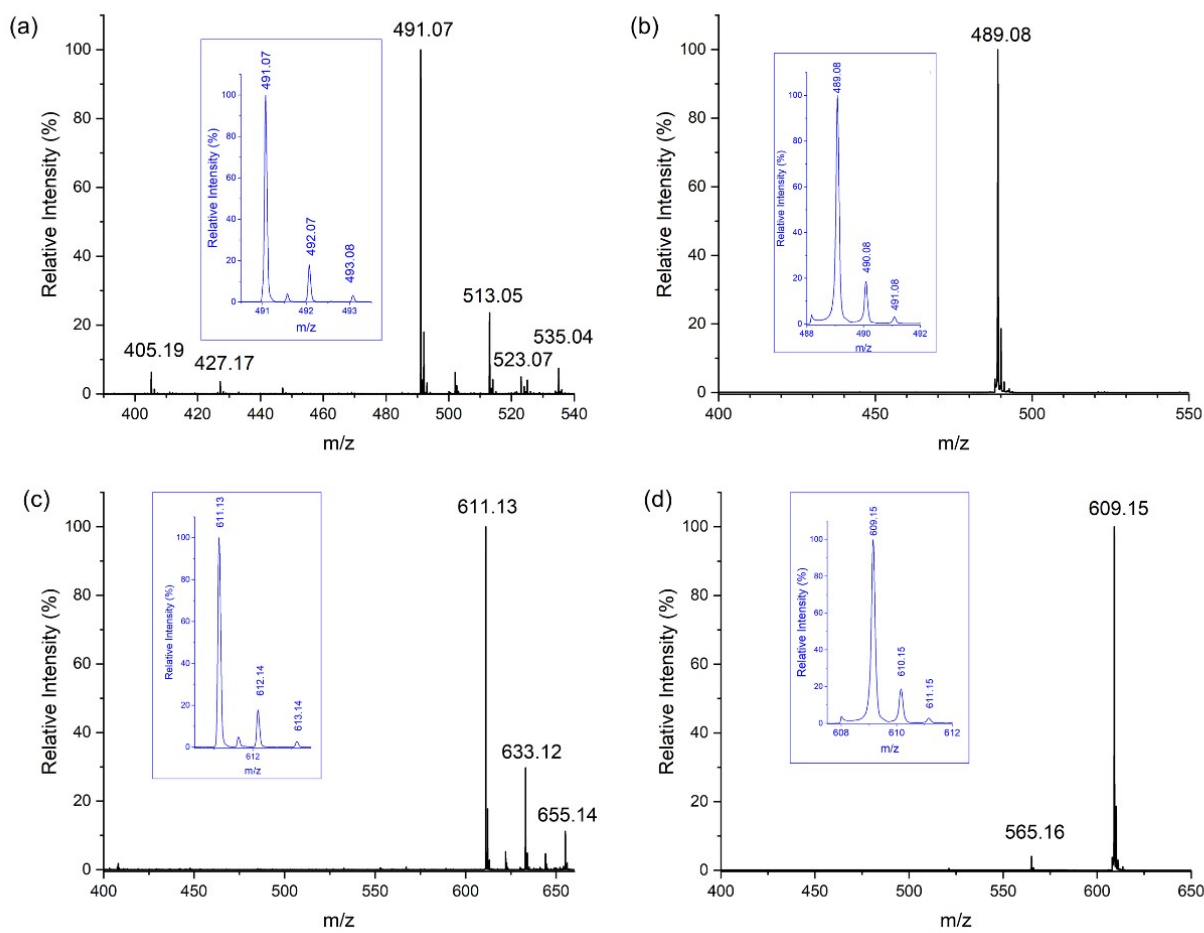

**Figure S5.** ESI mass spectra of samples containing acetonitrile: water (9:1). Samples were diluted from an aqueous solution containing Na[Sb(DOTA)·4H<sub>2</sub>O] (0.33 mM) incubated with M<sup>3+</sup> (M= Y, Bi) (0.67 mM) at 298 K for at least 2 hours. The replacement of Sb<sup>3+</sup> by Y<sup>3+</sup> was recorded in; (a) positive ESI mode showing peaks corresponding to [H<sub>2</sub>Y(DOTA)]<sup>+</sup> (m/z 491.07)(expanded in inset), [NaHY(DOTA)]<sup>+</sup> (m/z 513.05), and [Na<sub>2</sub>Y(DOTA)]<sup>+</sup> (m/z 535.04) and (b) negative ESI mode showing peaks corresponding to [Y(DOTA)]<sup>-</sup> (m/z 489.08)(expandd in inset). The replacement of Sb<sup>3+</sup> with Bi<sup>3+</sup> was recorded in; (c) positive ESI mode showing peaks corresponding to [H<sub>2</sub>Bi(DOTA)]<sup>+</sup> (m/z 611.13)(expanded in inset), [NaHBi(DOTA)]<sup>+</sup> (m/z 633.12), and [Na<sub>2</sub>Bi(DOTA)]<sup>+</sup> (m/z 655.14), and (d) negative ESI mode showing peaks corresponding to [Bi(DOTA)]<sup>-</sup> (m/z 609.15) and {[Bi(DOTA)]-CO<sub>2</sub>}<sup>-</sup> (m/z 565.15)(expanded in inset).

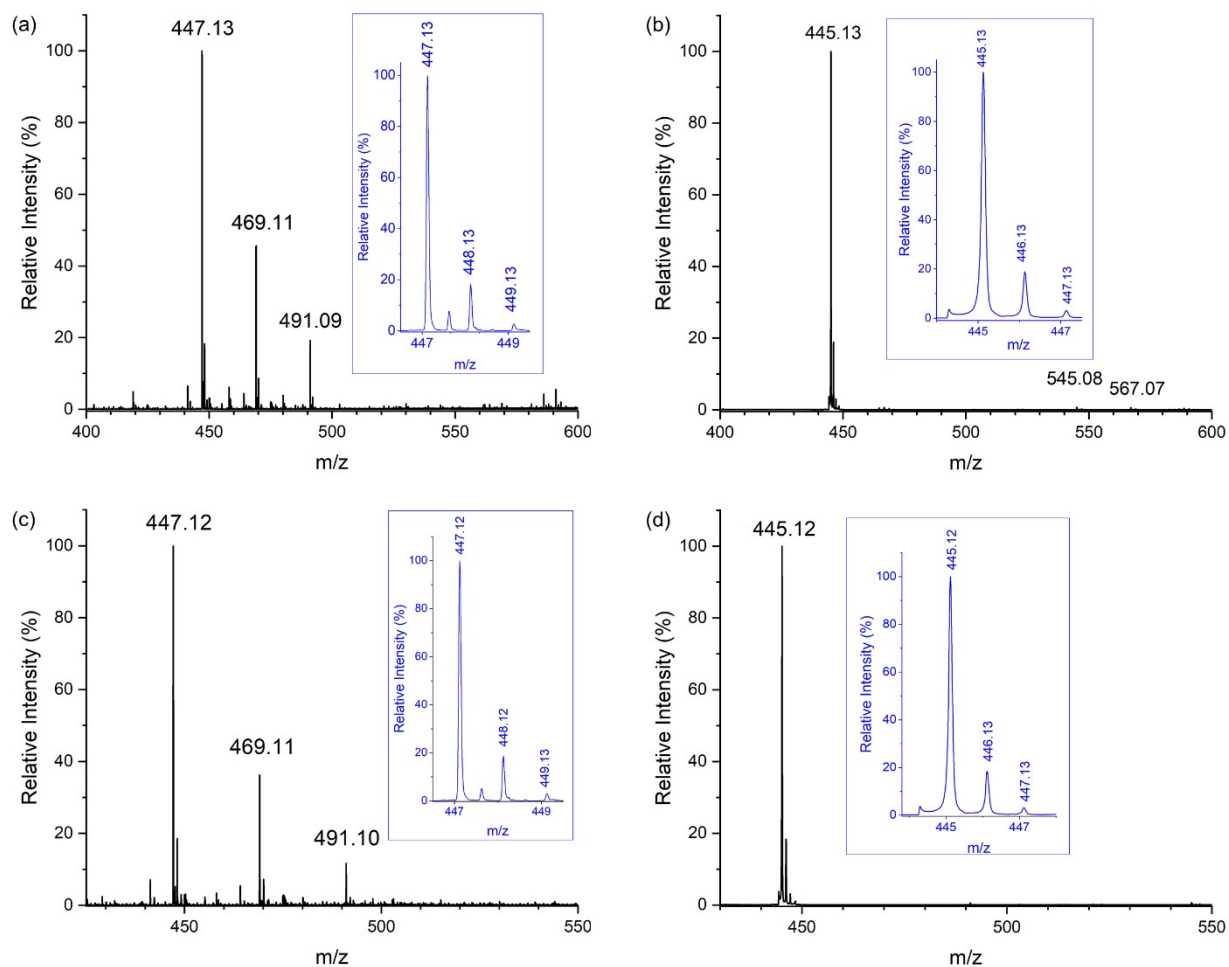

**Figure S6.** ESI mass spectra of samples containing acetonitrile: water (9:1). Samples were diluted from an aqueous solution containing Na[Sb(DOTA)·4H<sub>2</sub>O] (0.5 mM) and Sc(ClO<sub>4</sub>)<sub>3</sub> (0.5 mM) incubated at 298 K showing the replacement of Sb<sup>3+</sup> with Sc<sup>3+</sup> recorded in; **(a)** positive mode with peaks corresponding to [H<sub>2</sub>Sc(DOTA)]<sup>+</sup> (m/z 447.13) (expanded in inset), [NaHSc(DOTA)]<sup>+</sup> (m/z 469.11), and [Na<sub>2</sub>Sc(DOTA)]<sup>+</sup> (m/z 491.09) and **(b)** negative mode with peaks corresponding to [Sc(DOTA)]<sup>-</sup> (m/z 445.13) (expanded in inset), [NaHSb<sup>I</sup>(DOTA)]<sup>-</sup> (m/z 545.08), and [Na<sub>2</sub>Sb<sup>I</sup>(DOTA)]<sup>-</sup> (m/z 567.07). Samples were diluted from an aqueous solution containing Na[Sb(DOTA)·4H<sub>2</sub>O] (0.33 mM) and Sc(ClO<sub>4</sub>)<sub>3</sub> (0.67 mM) incubated at 298 K showing the replacement of Sb<sup>3+</sup> with Sc<sup>3+</sup> recorded in; **(c)** positive mode with peaks corresponding to [H<sub>2</sub>Sc(DOTA)]<sup>+</sup> (m/z 447.13) (expanded in inset), [NaHSc(DOTA)]<sup>+</sup> (m/z 469.11), and [Na<sub>2</sub>Sc(DOTA)]<sup>+</sup> (m/z 491.09) and **(d)** negative mode with peaks corresponding to [Sc(DOTA)]<sup>-</sup> (m/z 445.13) (expanded in inset).

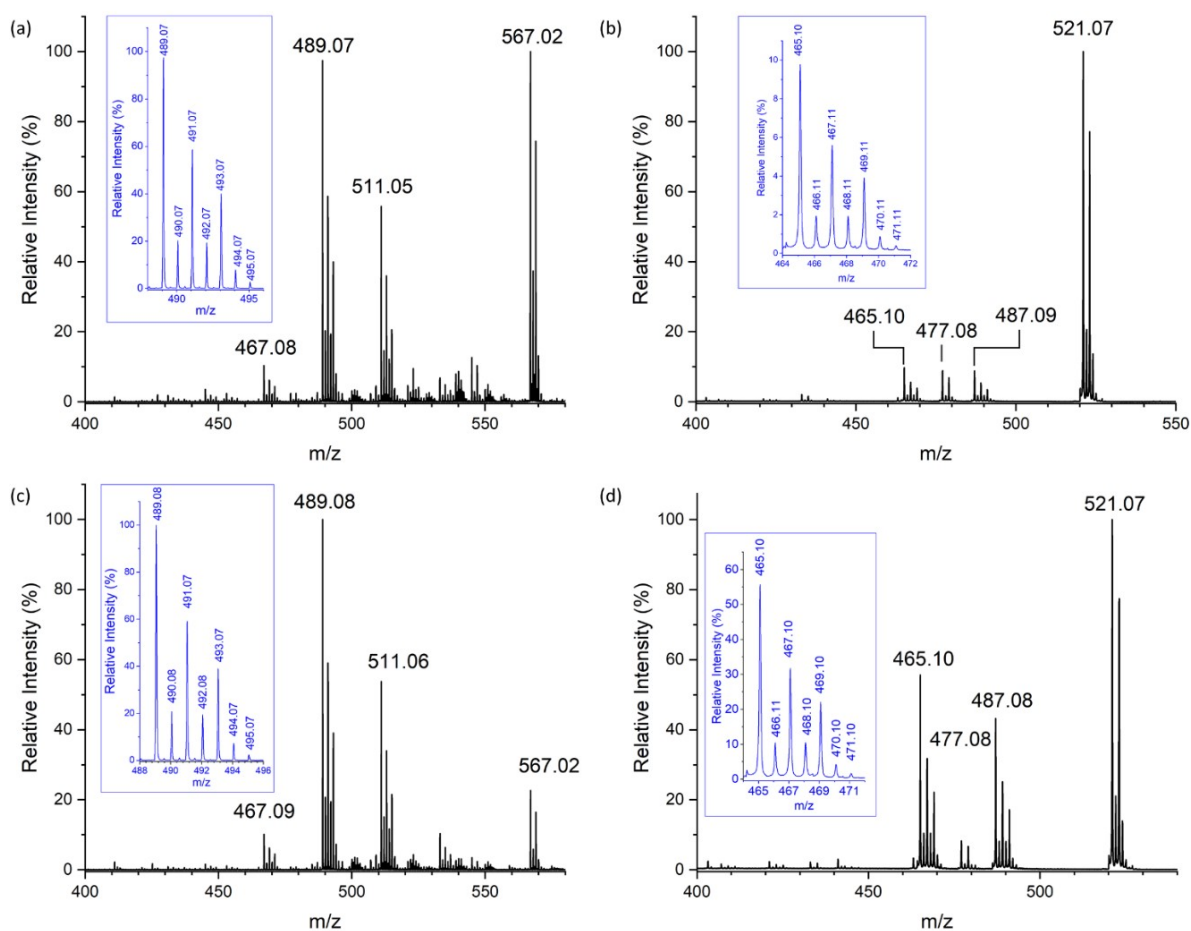

**Figure S7.** ESI mass spectra of samples containing acetonitrile: water (9:1). Samples were diluted from aqueous solutions of  $\text{Na}[\text{Sb}(\text{DOTA})\cdot 4\text{H}_2\text{O}]$  (0.5 mM) incubated with one molar equivalents of  $\text{ZnCl}_2$  (0.5 mM) for 2 hours at 298K and recorded in; **(a)** Positive mode showing peaks corresponding to  $[\text{H}_3\text{Zn}(\text{DOTA})]^+$  (m/z 467.08),  $[\text{H}_2\text{NaZn}(\text{DOTA})]^+$  (m/z 489.07) (expanded in inset),  $[\text{HN}_2\text{Zn}(\text{DOTA})]^+$  (m/z 511.05),  $[\text{Na}_2\text{Sb}(\text{DOTA})]^+$  (m/z 567.02) **(b)** Negative mode showing peaks corresponding to  $[\text{HZn}(\text{DOTA})]^-$  (m/z 465.10) (expanded in inset),  $[\text{Sb}(\text{DOTA})-\text{CO}_2]^-$  (m/z 477.08), and  $[\text{NaZn}(\text{DOTA})]^-$  (m/z 487.09) and  $[\text{Sb}(\text{DOTA})]^-$  (m/z 521.07).

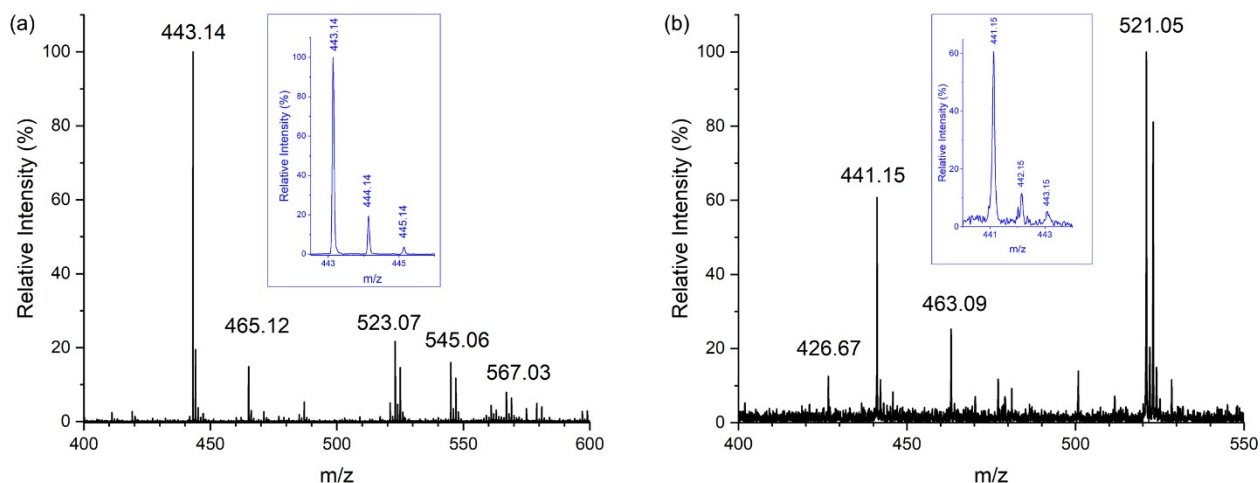

**Figure S8.** ESI mass spectra recorded in negative mode of samples containing acetonitrile: water (9:1). Samples were diluted from aqueous solutions containing  $\text{Na}[\text{Sb}(\text{DOTA})\cdot 4\text{H}_2\text{O}]$  (0.5mM) incubated with  $\text{Ca}(\text{NO}_3)_2\cdot 4\text{H}_2\text{O}$  (0.5 mM) at 298K showing the replacement of  $\text{Sb}^{3+}$  with  $\text{Ca}^{2+}$  recorded in; (a) Positive mode with peaks corresponding to  $[\text{H}_3\text{Ca}(\text{DOTA})]^+$  (m/z 443.14) (expanded in inset),  $[\text{NaH}_2\text{Ca}(\text{DOTA})]^+$  (m/z 465.12),  $[\text{H}_2\text{Sb}(\text{DOTA})]^+$  (m/z 523.07),  $[\text{NaHSb}(\text{DOTA})]^+$  (m/z 545.06), and  $[\text{Na}_2\text{Sb}(\text{DOTA})]^+$  (m/z 567.03). (b) Negative mode with peaks corresponding to  $[\text{HCa}(\text{DOTA})]^-$  (m/z 441.14) (expanded in inset),  $[\text{NaCa}(\text{DOTA})]^-$  (m/z 463.12), and  $[\text{Sb}(\text{DOTA})]^-$  (m/z 521.07).



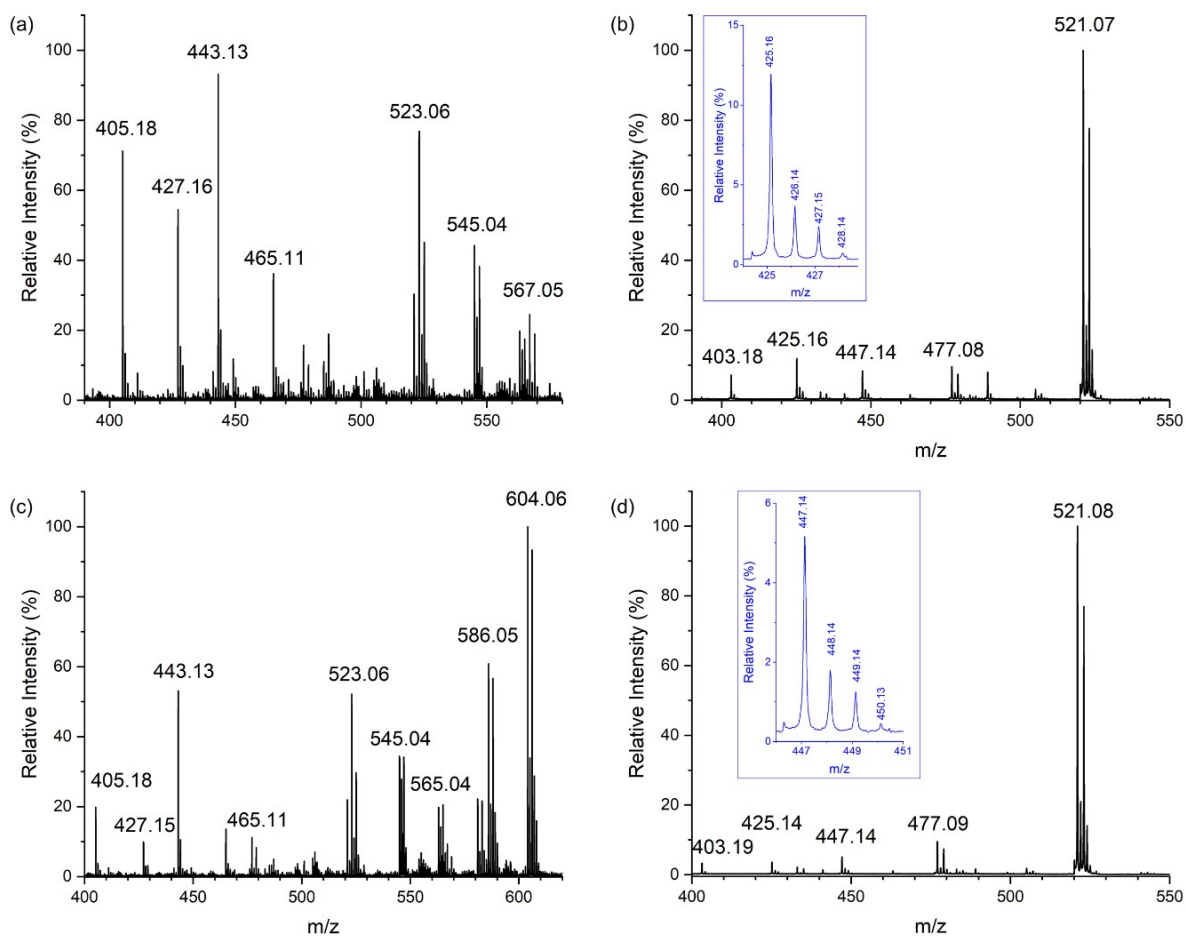

**Figure S9.** ESI mass spectra of samples containing acetonitrile: water (9:1). Samples were diluted from aqueous solutions of  $\text{Na[Sb(DOTA)·4H}_2\text{O]}$  (1 mM) incubated with one molar equivalents of  $\text{MgCl}_2\cdot 6\text{H}_2\text{O}$  for 2 hours at 298K and recorded in; **(a)** Positive mode showing peaks corresponding to  $[\text{H}_3\text{Mg(DOTA)}]^+$  ( $m/z$  427.16),  $[\text{H}_2\text{Sb(DOTA)}]^+$  ( $m/z$  523.06),  $[\text{HNaSb(DOTA)}]^+$  ( $m/z$  545.04),  $[\text{Na}_2\text{Sb(DOTA)}]^+$  ( $m/z$  567.02) **(b)** Negative mode showing peaks corresponding to  $[\text{HMg(DOTA)}]^-$  ( $m/z$  425.16) (expanded in inset),  $[\text{NaMg(DOTA)}]^-$  ( $m/z$  447.14),  $\{[\text{Sb(DOTA)}]^- \text{CO}_2\}$  ( $m/z$  477.08), and  $[\text{Sb(DOTA)}]^-$  ( $m/z$  521.07). Incubation with two molar equivalents of  $\text{MgCl}_2\cdot 6\text{H}_2\text{O}$  did not result in an observable increase in substitution of  $\text{Sb}^{3+}$  by  $\text{Mg}^{2+}$  in ESI mass spectra in both **(c)** positive and **(d)** negative modes.

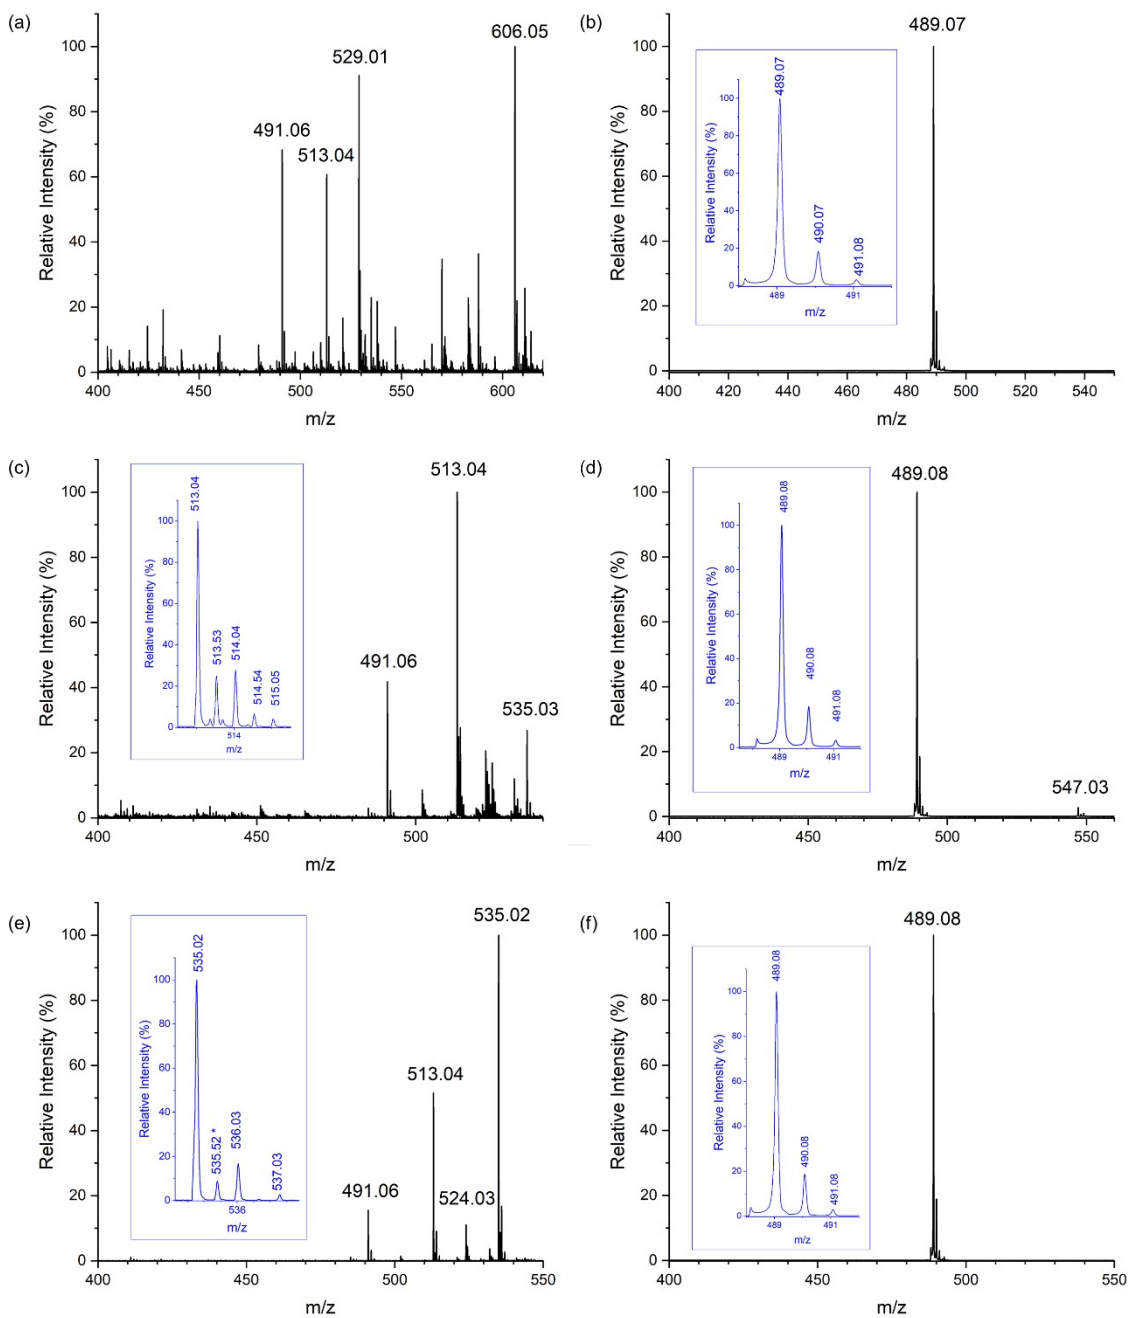

**Figure S10.** ESI mass spectra recorded in negative mode of samples containing acetonitrile: water (9:1). Samples were diluted from aqueous solutions containing  $\text{Na}[\text{Y}(\text{DOTA})\cdot 4\text{H}_2\text{O}]$  (0.33 mM) incubated with 2 molar equivalents of  $\text{M}^{2+}$  (0.67 mMol) ( $\text{M}=\text{Ca}, \text{Mg}, \text{Zn}$ ) ions. Incubation with  $\text{Ca}(\text{NO}_3)_2\cdot 4\text{H}_2\text{O}$  (0.67 mM) recorded in; **(a)** ESI positive mode and **(b)** ESI negative mode did not result in any observable replacement of  $\text{Y}^{3+}$  with  $\text{Ca}^{2+}$ , peak corresponding to  $[\text{CaY}(\text{DOTA})]^+$  (m/z 529.01). Incubation with  $\text{MgCl}_2\cdot 6\text{H}_2\text{O}$  (0.67 mM) recorded in; **(c)** ESI positive and **(d)** ESI negative mode did not result in any observable replacement of  $\text{Y}^{3+}$  with  $\text{Mg}^{2+}$ . Incubation with  $\text{ZnCl}_2$  (0.67 mM) recorded in; **(e)** ESI positive mode and **(f)** ESI negative mode did not result in any observable replacement of  $\text{Y}^{3+}$  with  $\text{Zn}^{2+}$ . ESI positive spectra show peaks corresponding to  $[\text{H}_2\text{Y}(\text{DOTA})]^+$  (m/z 491.06) (expanded in inset),  $[\text{NaHY}(\text{DOTA})]^+$  (m/z 513.04) (expanded in inset), and  $[\text{Na}_2\text{Y}(\text{DOTA})]^+$  (m/z 535.02). ESI negative spectra showing peaks corresponding to  $[\text{Y}(\text{DOTA})]^-$  (m/z 489.08) (expanded in inset).

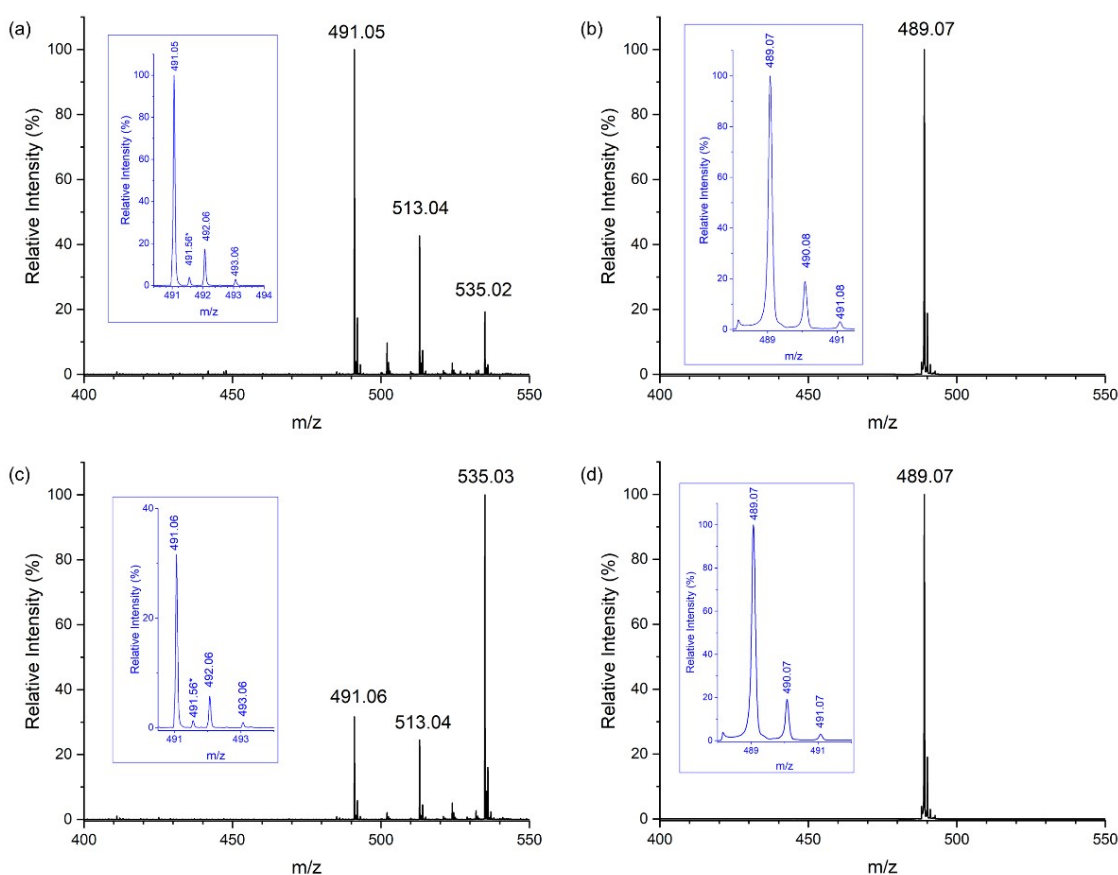

**Figure S11.** ESI mass spectra recorded in negative mode of samples containing acetonitrile: water (9:1). Samples were diluted from aqueous solutions containing  $\text{Na}[\text{Y}(\text{DOTA})\cdot 4\text{H}_2\text{O}]$  (0.33 mM) incubated with 2 molar equivalents of  $\text{M}^{3+}$  (0.67 mMol) ( $\text{M}=\text{Bi}$  and  $\text{Sb}$ ) for at least 2 hours at 298 K. The ESI mass spectra of the incubation with  $\text{Bi}(\text{NO}_3)_3\cdot 5\text{H}_2\text{O}$  recorded in **(a)** positive and **(b)** negative modes did not result in any substitution of the  $\text{Y}^{3+}$  in  $[\text{Y}(\text{DOTA})]^-$ . The ESI mass spectra of the incubation with  $\text{Sb}_2(\text{SO}_4)_3$  recorded in **(c)** positive and **(d)** negative modes did not result in any substitution of the  $\text{Y}^{3+}$  in  $[\text{Y}(\text{DOTA})]^-$ . Only peaks corresponding to  $[\text{H}_2\text{Y}(\text{DOTA})]^+$  (m/z 491.05) (expanded in inset),  $[\text{NaHY}(\text{DOTA})]^+$  (m/z 513.04), and  $[\text{Na}_2\text{Y}(\text{DOTA})]^+$  (m/z 535.03) were observed in ESI positive mass spectra, and  $[\text{Y}(\text{DOTA})]^-$  (m/z 489.07) (expanded in inset) were observed in ESI negative spectra.

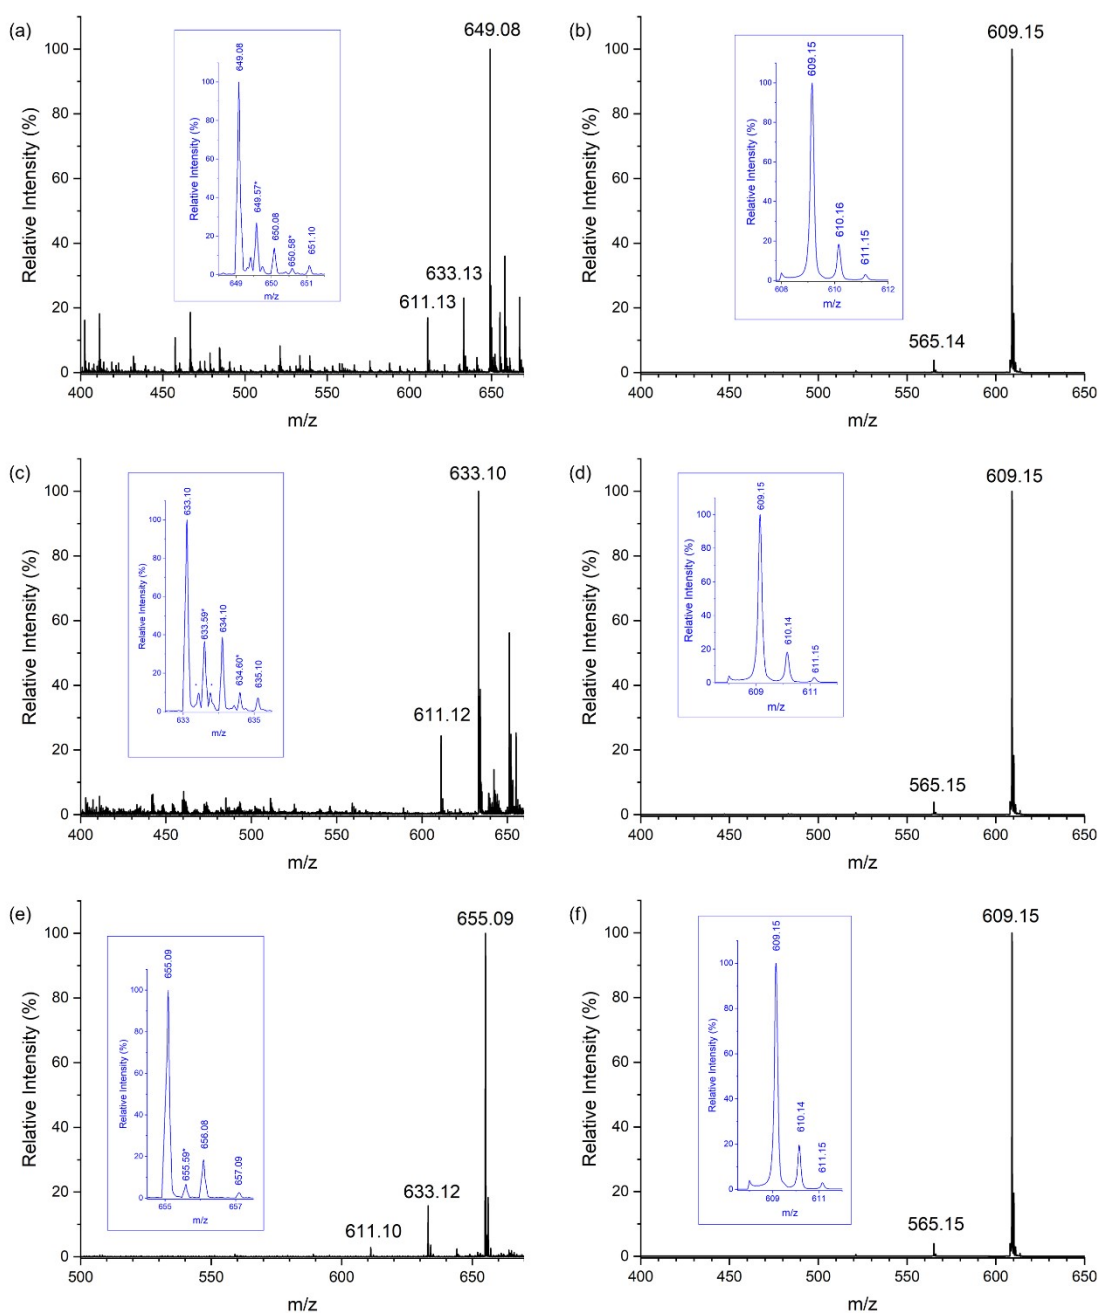

**Figure S12.** ESI mass spectra recorded in negative mode of samples containing acetonitrile: water (9:1). Samples were diluted from aqueous solutions containing Na[Bi(DOTA)·4H<sub>2</sub>O] (0.33 mM) incubated with 2 molar equivalents of M<sup>2+</sup> (M=Ca, Mg, and Zn) (0.67 mMol) for at least 2 hours at 298 K. The incubation of Na[Bi(DOTA)·4H<sub>2</sub>O] with Ca(NO<sub>3</sub>)<sub>2</sub>·5H<sub>2</sub>O, MgCl<sub>2</sub>·6H<sub>2</sub>O, and ZnCl<sub>2</sub> did not result in any observable substitution of Bi<sup>3+</sup> with Ca<sup>2+</sup>, Mg<sup>2+</sup> or Zn<sup>2+</sup> as observed in the ESI mass spectra recorded in positive mode (a), (c), and (e) respectively, or in negative mode (b), (d) and (f) respectively. Peaks observed corresponding to [H<sub>2</sub>Bi(DOTA)]<sup>+</sup> (m/z 611.10), [NaHBi(DOTA)]<sup>+</sup> (m/z 633.10) (expanded in inset), [Na<sub>2</sub>Bi(DOTA)]<sup>+</sup> (m/z 655.09) (expanded in inset), and [CaBi(DOTA)]<sup>+</sup> (m/z 649.08) (expanded in inset) were observed in ESI positive mass spectra and peaks corresponding to [Bi(DOTA)]<sup>-</sup> (m/z 609.15) and {[Bi(DOTA)]-CO<sub>2</sub>}<sup>-</sup> (m/z 565.15) were observed in ESI negative mass spectra.

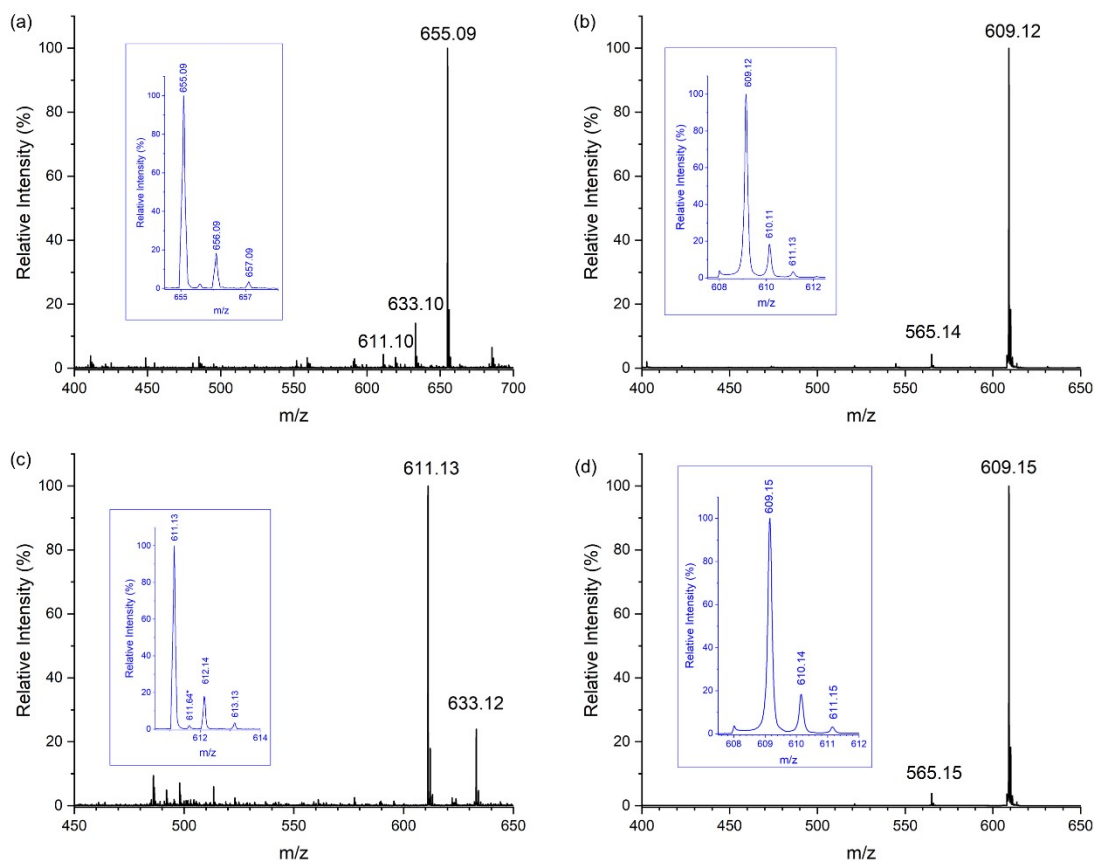

**Figure S13.** ESI mass spectra recorded in negative mode of samples containing acetonitrile: water (9:1). Samples were diluted from aqueous solutions containing  $\text{Na}[\text{Bi}(\text{DOTA})\cdot 4\text{H}_2\text{O}]$  (0.33 mM) incubated with 2 molar equivalents of  $\text{M}^{3+}$  (0.67 mMol) ( $\text{M}=\text{Sb}$  and  $\text{Y}$ ) for at least 2 hours at 298 K. The ESI mass spectra of the incubation with  $\text{Sb}_2(\text{SO}_4)_3$  recorded in **(a)** positive and **(b)** negative modes did not result in any substitution of the  $\text{Bi}^{3+}$  in  $[\text{Bi}(\text{DOTA})]^-$ . The ESI mass spectra of the incubation with  $\text{Y}(\text{NO}_3)_3\cdot 6\text{H}_2\text{O}$  recorded in **(c)** positive and **(d)** negative modes did not result in any substitution of the  $\text{Bi}^{3+}$  in  $[\text{Bi}(\text{DOTA})]^-$ . Only peaks corresponding to  $[\text{H}_2\text{Bi}(\text{DOTA})]^+$  ( $m/z$  655.09) (expanded in inset),  $[\text{NaHBi}(\text{DOTA})]^+$  ( $m/z$  633.12), and  $[\text{Na}_2\text{Bi}(\text{DOTA})]^+$  ( $m/z$  535.03) were observed in ESI positive mass spectra, and  $[\text{Bi}(\text{DOTA})]^-$  ( $m/z$  609.15) (expanded in inset) and  $\{[\text{Bi}(\text{DOTA})-\text{CO}_2]^-$  ( $m/z$  565.15) were observed in ESI negative spectra.

## 2. PXRD

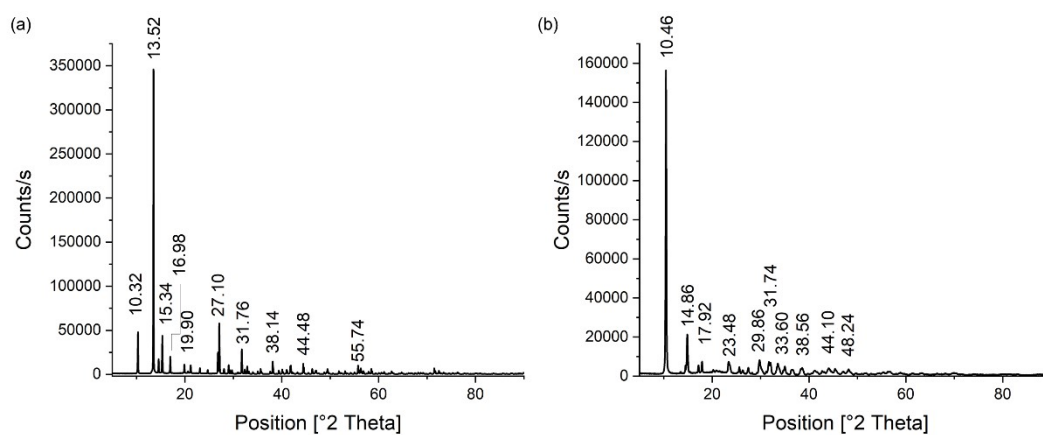

Figure S14. PXRD of (a)  $[H_3O][Bi(DOTA)]H_2O$  and (b)  $Na[Bi(DOTA)\cdot 4H_2O]$

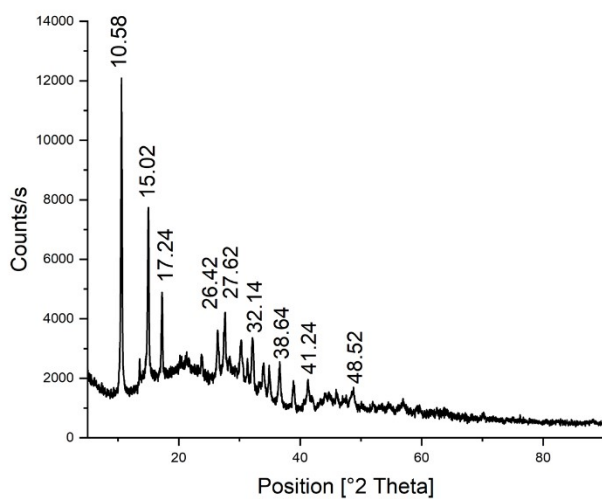

Figure S15. PXRD of  $Na[Sb(DOTA)\cdot 4H_2O]$

### 3. Crystallography

[H<sub>6</sub>DOTA]Cl<sub>2</sub>·4H<sub>2</sub>O·DMSO:

#### Refinement

The crystal was twinned by rotation of 1.56° around [0.10 -0.99 0.09] (reciprocal) or [0.34 -0.90 0.27] (direct) and was refined using HKLF 5 data; the ratio of the components was 0.75035:0.24965. One of the chloride ions and one of the water molecules were disordered they were refined with Cl:H<sub>2</sub>O occupancies of 9:1 at one site and 1:9 at the other. The minor components of the disorder were refined isotropically. DFIX constraints were applied to the O–H distances.

Further Figures

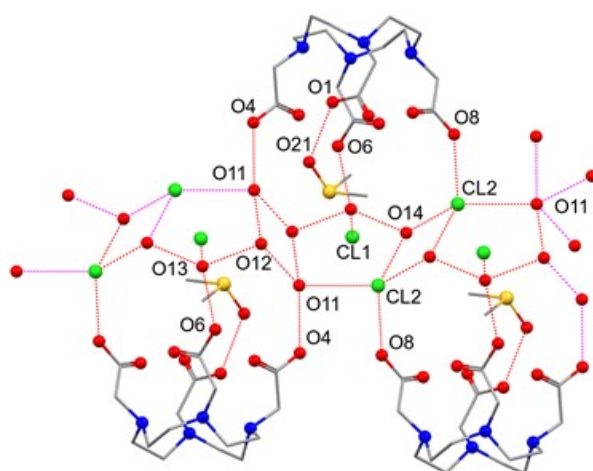

Figure S16. H-bonding network in [H<sub>6</sub>DOTA]Cl<sub>2</sub>·4H<sub>2</sub>O·DMSO.

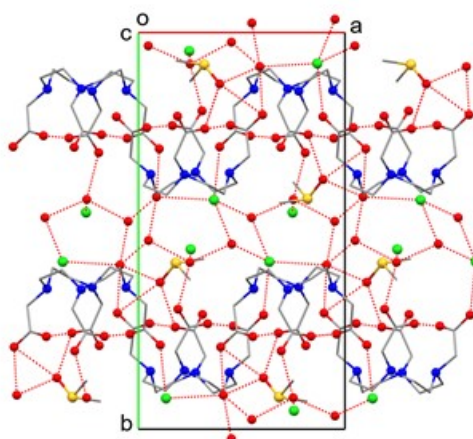

Figure S17. Packing diagram for [H<sub>6</sub>DOTA]Cl<sub>2</sub>·4H<sub>2</sub>O·DMSO viewed down the c axis

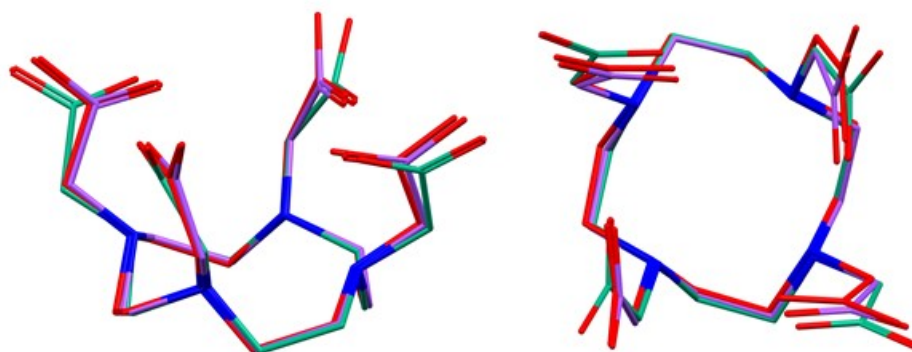

**Figure S18.** Overlays of the H<sub>4</sub>DOTA or H<sub>6</sub>DOTA<sup>2+</sup> moieties from [H<sub>6</sub>DOTA]Cl<sub>2</sub>·4H<sub>2</sub>O·DMSO (carbon atoms shown red), H<sub>4</sub>DOTA·2H<sub>2</sub>O ULEVAJ (green) and H<sub>6</sub>DOTA]Cl<sub>2</sub>·5H<sub>2</sub>O GOYBUR (purple).

**Table S1.** Hydrogen-bond geometry (Å, °) for [H<sub>6</sub>DOTA]Cl<sub>2</sub>·4H<sub>2</sub>O·DMSO

| <i>D</i> —H··· <i>A</i>     | <i>D</i> —H | H··· <i>A</i> | <i>D</i> ··· <i>A</i> | <i>D</i> —H··· <i>A</i> |
|-----------------------------|-------------|---------------|-----------------------|-------------------------|
| O1—H1···O21                 | 0.82        | 1.73          | 2.538 (3)             | 166                     |
| O4—H4···O11                 | 0.79        | 1.90          | 2.675 (3)             | 167                     |
| O4—H4···Cl2'                | 0.79        | 2.12          | 2.860 (9)             | 157                     |
| O6—H6···O13                 | 0.81        | 1.84          | 2.619 (2)             | 162                     |
| O8—H8···Cl2                 | 0.78 (2)    | 2.27 (3)      | 2.991 (2)             | 154 (3)                 |
| O8—H8···O11'                | 0.78 (2)    | 2.04 (4)      | 2.79 (3)              | 163 (4)                 |
| N2—H2···N1                  | 0.84 (3)    | 2.54 (3)      | 2.964 (3)             | 112 (2)                 |
| N2—H2···N3                  | 0.84 (3)    | 2.55 (3)      | 2.957 (2)             | 111 (2)                 |
| N4—H4A···N3                 | 0.86 (3)    | 2.46 (3)      | 2.928 (3)             | 115 (2)                 |
| C1—H1A···O1                 | 0.97        | 2.54          | 3.034 (3)             | 112                     |
| C2—H2A···Cl1 <sup>i</sup>   | 0.97        | 2.77          | 3.727 (2)             | 169                     |
| C3—H3B···Cl2 <sup>iii</sup> | 0.97        | 2.72          | 3.599 (9)             | 150                     |
| C5—H5A···O2 <sup>iii</sup>  | 0.97        | 2.36          | 3.253 (3)             | 153                     |
| C5—H5B···Cl1 <sup>iv</sup>  | 0.97        | 2.71          | 3.566 (2)             | 148                     |
| C6—H6A···Cl1 <sup>i</sup>   | 0.97        | 2.82          | 3.783 (2)             | 174                     |
| C9—H9A···O5                 | 0.97        | 2.63          | 3.132 (3)             | 113                     |
| C10—H10A···Cl1 <sup>i</sup> | 0.97        | 2.77          | 3.732 (2)             | 172                     |
| C11—H11A···O3               | 0.97        | 2.63          | 3.124 (3)             | 112                     |
| C13—H13A···O6 <sup>ii</sup> | 0.97        | 2.49          | 3.396 (3)             | 156                     |
| C13—H13A···O7               | 0.97        | 2.64          | 3.125 (3)             | 111                     |



|                                |          |          |             |         |
|--------------------------------|----------|----------|-------------|---------|
| C13—H13B···C11 <sup>ii</sup>   | 0.97     | 2.76     | 3.595 (2)   | 144     |
| C14—H14A···C11 <sup>i</sup>    | 0.97     | 2.73     | 3.684 (2)   | 170     |
| C14—H14B···O12 <sup>ii</sup>   | 0.97     | 2.59     | 3.475 (3)   | 152     |
| C15—H15A···O21 <sup>v</sup>    | 0.97     | 2.61     | 3.371 (3)   | 135     |
| C22—H22A···C11 <sup>vi</sup>   | 0.96     | 2.76     | 3.688 (3)   | 164     |
| C22—H22B···O14 <sup>vii</sup>  | 0.96     | 2.57     | 3.461 (4)   | 154     |
| C22—H22C···O2                  | 0.96     | 2.56     | 3.289 (4)   | 133     |
| C21—H21A···O7                  | 0.96     | 2.58     | 3.496 (4)   | 160     |
| C21—H21C···O3                  | 0.96     | 2.57     | 3.275 (3)   | 131     |
| O12—H12A···O13                 | 0.78 (2) | 2.05 (2) | 2.819 (3)   | 169 (4) |
| O12—H12B···O11 <sup>viii</sup> | 0.77 (2) | 2.24 (3) | 2.956 (3)   | 155 (4) |
| O12—H12B···C12 <sup>viii</sup> | 0.77 (2) | 2.43 (3) | 3.102 (9)   | 148 (4) |
| O14—H14C···C12                 | 0.82 (2) | 2.33 (2) | 3.117 (2)   | 164 (4) |
| O14—H14C···O11'                | 0.82 (2) | 2.22 (4) | 3.02 (3)    | 168 (4) |
| O14—H14D···C12 <sup>vii</sup>  | 0.81 (2) | 2.32 (3) | 3.092 (2)   | 159 (4) |
| O14—H14D···O11 <sup>vii</sup>  | 0.81 (2) | 2.31 (4) | 3.12 (3)    | 171 (4) |
| O13—H13C···C11                 | 0.80 (2) | 2.24 (2) | 3.0276 (17) | 169 (3) |
| O13—H13D···O14                 | 0.79 (2) | 1.90 (2) | 2.685 (3)   | 175 (4) |
| O11—H11C···O12                 | 0.83 (2) | 1.96 (2) | 2.792 (3)   | 175 (4) |
| O11—H11D···C12 <sup>ix</sup>   | 0.82 (2) | 2.31 (2) | 3.104 (3)   | 162 (4) |
| O11'—H11E···O14 <sup>vii</sup> | 0.83     | 2.46     | 3.12 (3)    | 137     |
| O11'—H11F···C12 <sup>x</sup>   | 0.84     | 2.53     | 3.16 (3)    | 132     |

Symmetry codes: (i)  $-x+3/2, y-1/2, -z+3/2$ ; (ii)  $x-1/2, -y+1/2, z-1/2$ ; (iii)  $x+1/2, -y+1/2, z+1/2$ ; (iv)  $x+1/2, -y+1/2, z-1/2$ ; (v)  $x-1/2, -y+1/2, z+1/2$ ; (vi)  $x, y, z-1$ ; (vii)  $-x+1, -y+1, -z+1$ ; (viii)  $-x+2, -y+1, -z+1$ ; (ix)  $x+1, y, z$ ; (x)  $x-1, y, z$ .

## Na[Sb(DOTA)]·4H<sub>2</sub>O and Na[Bi(DOTA)]·4H<sub>2</sub>O:

### Refinement

These two isomorphous structures were treated identically. The unit cell dimensions for Na[Bi(DOTA)]·4H<sub>2</sub>O are the same as those reported previously (HADRAG) but the published structure was solved in C2/c with disorder of the sodium ion and several water molecules. This solution can be replicated with the current data sets. However, examination of the data showed that, while the data with  $h+k$ =odd are weak, they are not absent (~30% of the mean intensity for the data set, see below). Since the refinement in P2/c shows no disorder, we conclude that this is the correct choice and that the apparent centering is a consequence of the majority of the electron density being on the heavy atoms which have higher symmetry than the overall structure.

**Table S2.** Lattice type analyses for Na[Sb(DOTA)]·4H<sub>2</sub>O and Na[Bi(DOTA)]·4H<sub>2</sub>O.

### Na[Sb(DOTA)]·4H<sub>2</sub>O

| Lattice exceptions: | P   | A     | B     | C     | I     | F     | Obv   | Rev   | All   |
|---------------------|-----|-------|-------|-------|-------|-------|-------|-------|-------|
| N (total) =         | 0   | 48202 | 48187 | 48219 | 48202 | 72304 | 64217 | 64269 | 96342 |
| N (int>3sigma) =    | 0   | 35850 | 37131 | 32267 | 37596 | 52624 | 49649 | 49666 | 74509 |
| Mean intensity =    | 0.0 | 30.0  | 30.3  | 9.4   | 24.7  | 23.2  | 31.6  | 31.2  | 31.3  |
| Mean int/sigma =    | 0.0 | 14.0  | 14.4  | 7.6   | 13.1  | 12.0  | 14.6  | 14.5  | 14.5  |

Lattice type: P chosen      Volume: 2158.62

### Na[Bi(DOTA)]·4H<sub>2</sub>O:

| Lattice exceptions: | P   | A     | B     | C     | I     | F     | Obv   | Rev   | All   |
|---------------------|-----|-------|-------|-------|-------|-------|-------|-------|-------|
| N (total) =         | 0   | 48774 | 48895 | 48849 | 48825 | 73259 | 65123 | 65216 | 97738 |
| N (int>3sigma) =    | 0   | 36257 | 36943 | 31610 | 38890 | 52405 | 50372 | 50676 | 75706 |
| Mean intensity =    | 0.0 | 49.3  | 49.3  | 13.0  | 49.9  | 37.2  | 50.1  | 50.0  | 49.9  |
| Mean int/sigma =    | 0.0 | 13.2  | 13.4  | 7.3   | 14.5  | 11.3  | 13.5  | 13.5  | 13.5  |

Lattice type: P chosen      Volume: 2183.21

DFIX constraints were applied to the O–H distances of the coordinated water molecules. The Na1 – O11 bond is significantly longer than the others and this resulted in an unusual orientation of the (located) H atoms. Some additional DANG restraints were employed. The geometry could be further “improved” but this results in a poorer fit to the electron density.

## Further Figures

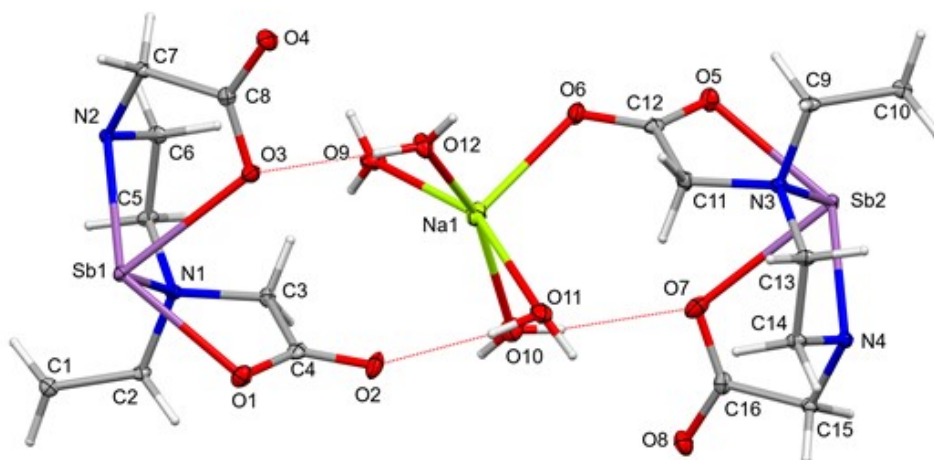

**Figure S19.** Asymmetric unit of  $\text{Na}[\text{Sb}(\text{DOTA})]\cdot 4\text{H}_2\text{O}$ , showing atom labels and 50% probability ellipsoids,  $\text{OH}\cdots\text{O}$  H-bonds shown dotted.

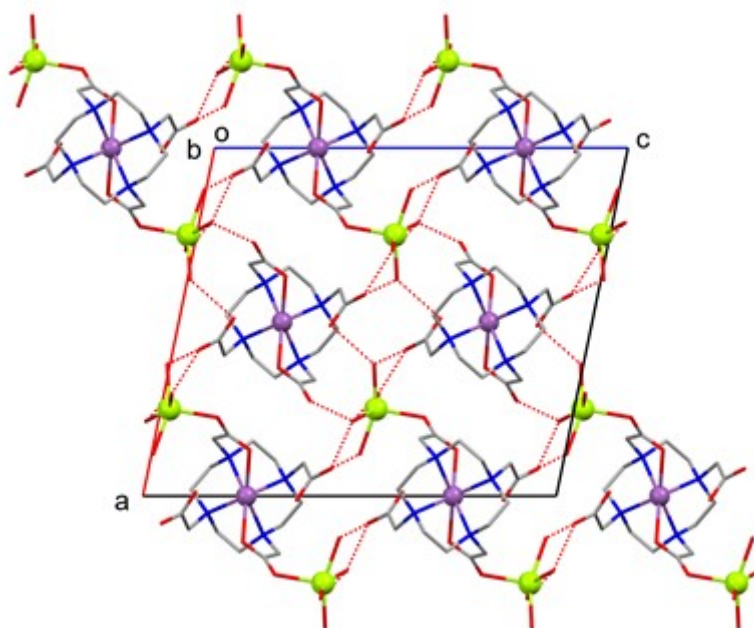

**Figure S20.** Packing diagram of  $\text{Na}[\text{Sb}(\text{DOTA})]\cdot 4\text{H}_2\text{O}$  viewed down the  $b$  axis, showing  $\text{OH}\cdots\text{O}$  H bonds as dotted lines, H atoms omitted for clarity.

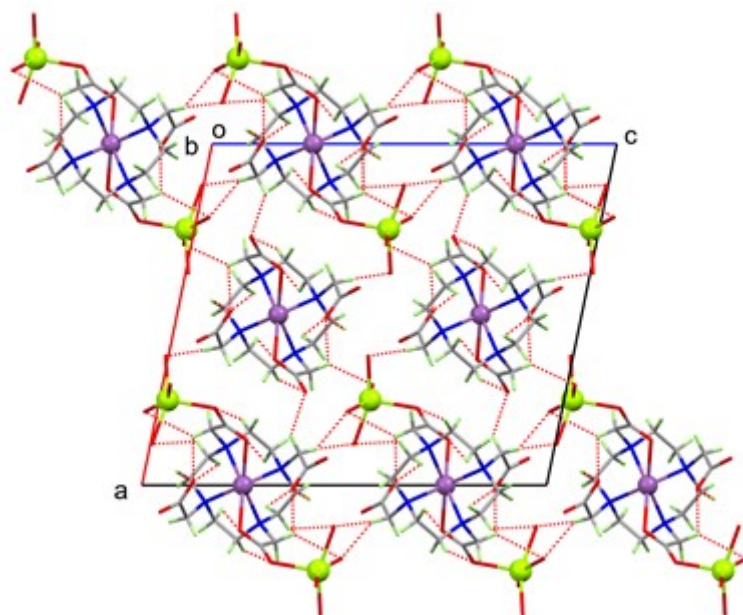

**Figure S21.** Packing diagram of Na[Sb(DOTA)]·4H<sub>2</sub>O viewed down the I axis, showing CH...O H bonds as dotted lines, H atoms of water molecules omitted for clarity.

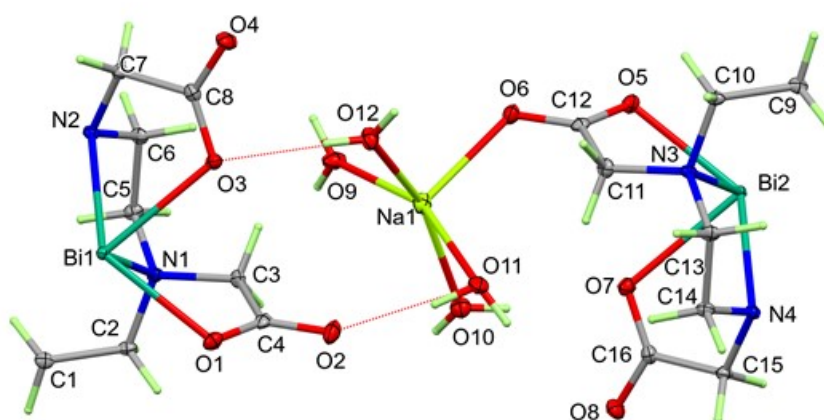

**Figure S22.** Asymmetric unit of Na[Bi(DOTA)]·4H<sub>2</sub>O, showing atom labels and 50% probability ellipsoids, OH...O H-bonds shown dotted.

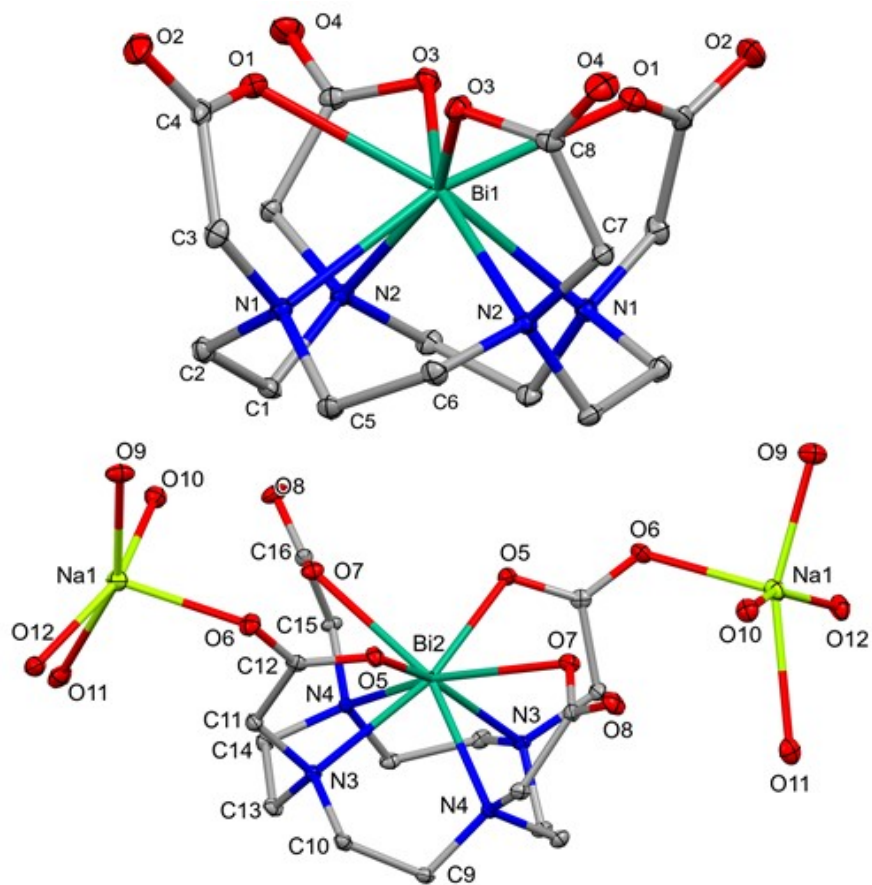

**Figure S23.** [Bi(DOTA)]<sup>-</sup> (top) and [(Na(H<sub>2</sub>O)<sub>4</sub>)<sub>2</sub>Bi(DOTA)]<sup>+</sup> (bottom) drawn with 50% probability ellipsoids. Carbon atoms are labelled for one asymmetric unit and H atoms are omitted.

**Table S3.** Hydrogen-bond geometry (Å, °) for Na[Sb(DOTA)]·4H<sub>2</sub>O

| <i>D</i> —H··· <i>A</i>       | <i>D</i> —H | H··· <i>A</i> | <i>D</i> ··· <i>A</i> | <i>D</i> —H··· <i>A</i> |
|-------------------------------|-------------|---------------|-----------------------|-------------------------|
| O9—H9C···O4 <sup>iv</sup>     | 0.80 (1)    | 1.98 (2)      | 2.7782 (15)           | 176 (2)                 |
| O9—H9D···O11 <sup>iii</sup>   | 0.82 (2)    | 1.93 (2)      | 2.7451 (16)           | 177 (2)                 |
| O10—H10C···O7                 | 0.80 (1)    | 2.20 (1)      | 2.9851 (16)           | 169 (2)                 |
| O10—H10D···O8 <sup>vii</sup>  | 0.81 (1)    | 2.06 (2)      | 2.8736 (16)           | 175 (2)                 |
| O11—H11C···O8 <sup>vi</sup>   | 0.82 (1)    | 2.01 (1)      | 2.8143 (16)           | 171 (2)                 |
| O11—H11D···O2                 | 0.84 (1)    | 1.94 (2)      | 2.7556 (15)           | 164 (2)                 |
| O12—H12A···O3                 | 0.80 (1)    | 2.10 (1)      | 2.8921 (15)           | 174 (2)                 |
| O12—H12B···O4 <sup>viii</sup> | 0.80 (1)    | 2.05 (2)      | 2.8389 (15)           | 174 (2)                 |
| C1—H1A···O1 <sup>iii</sup>    | 0.97        | 2.59          | 3.2151 (17)           | 122                     |
| C2—H2B···O2 <sup>iii</sup>    | 0.97        | 2.59          | 3.5082 (18)           | 158                     |
| C3—H3A···O9                   | 0.97        | 2.57          | 3.2284 (18)           | 125                     |
| C5—H5A···O3 <sup>iii</sup>    | 0.97        | 2.64          | 3.2465 (17)           | 121                     |
| C6—H6A···O3                   | 0.97        | 2.61          | 3.0851 (17)           | 111                     |
| C7—H7A···O1 <sup>i</sup>      | 0.97        | 2.62          | 3.1186 (17)           | 112                     |
| C7—H7B···O12 <sup>iv</sup>    | 0.97        | 2.60          | 3.5453 (18)           | 164                     |
| C9—H9A···O6 <sup>v</sup>      | 0.97        | 2.62          | 3.5331 (17)           | 158                     |
| C10—H10B···O5 <sup>v</sup>    | 0.97        | 2.60          | 3.2315 (17)           | 123                     |
| C11—H11B···O7                 | 0.97        | 2.62          | 3.1389 (18)           | 114                     |
| C11—H11B···O11                | 0.97        | 2.66          | 3.3417 (18)           | 128                     |
| C13—H13A···O10 <sup>v</sup>   | 0.97        | 2.63          | 3.3136 (17)           | 128                     |
| C14—H14B···O7                 | 0.97        | 2.60          | 3.1004 (18)           | 112                     |
| C15—H15A···O10 <sup>vi</sup>  | 0.97        | 2.53          | 3.4763 (18)           | 166                     |
| C15—H15A···O11 <sup>vi</sup>  | 0.97        | 2.63          | 3.1655 (17)           | 115                     |
| C15—H15B···O2 <sup>vi</sup>   | 0.97        | 2.53          | 3.1362 (17)           | 121                     |
| C15—H15B···O5 <sup>ii</sup>   | 0.97        | 2.57          | 3.1129 (17)           | 116                     |

Symmetry codes: (i)  $-x+1, y, -z+1/2$ ; (ii)  $-x+2, y, -z+3/2$ ; (iii)  $x, y+1, z$ ; (iv)  $-x+1, -y+2, -z+1$ ; (v)  $x, y-1, z$ ; (vi)  $-x+2, -y+1, -z+1$ ; (vii)  $-x+2, -y+2, -z+1$ ; (viii)  $-x+1, -y+1, -z+1$ .

**Table S4.** Hydrogen-bond geometry (Å, °) for Na[Bi(DOTA)]·4H<sub>2</sub>O

| <i>D</i> —H··· <i>A</i>       | <i>D</i> —H | H··· <i>A</i> | <i>D</i> ··· <i>A</i> | <i>D</i> —H··· <i>A</i> |
|-------------------------------|-------------|---------------|-----------------------|-------------------------|
| C1—H1A···O1 <sup>iii</sup>    | 0.99        | 2.62          | 3.2433 (18)           | 121                     |
| C3—H3A···O9                   | 0.99        | 2.51          | 3.214 (2)             | 128                     |
| C6—H6A···O3                   | 0.99        | 2.64          | 3.1199 (18)           | 110                     |
| C7—H7B···O12 <sup>iv</sup>    | 0.99        | 2.60          | 3.561 (2)             | 164                     |
| C9—H9B···O5 <sup>v</sup>      | 0.99        | 2.62          | 3.2524 (18)           | 122                     |
| C11—H11B···O11                | 0.99        | 2.61          | 3.335 (2)             | 130                     |
| C13—H13A···O10 <sup>v</sup>   | 0.99        | 2.64          | 3.3382 (19)           | 127                     |
| C14—H14B···O7                 | 0.99        | 2.64          | 3.1330 (19)           | 111                     |
| C15—H15A···O10 <sup>vi</sup>  | 0.99        | 2.52          | 3.4918 (19)           | 166                     |
| C15—H15A···O11 <sup>vi</sup>  | 0.99        | 2.64          | 3.1627 (19)           | 113                     |
| C15—H15B···O2 <sup>vi</sup>   | 0.99        | 2.50          | 3.134 (2)             | 122                     |
| O9—H9C···O4 <sup>iv</sup>     | 0.83 (2)    | 1.95 (2)      | 2.7809 (17)           | 178 (2)                 |
| O9—H9D···O11 <sup>iii</sup>   | 0.85 (2)    | 1.89 (2)      | 2.7454 (17)           | 177 (2)                 |
| O10—H10C···O7                 | 0.83 (2)    | 2.19 (2)      | 3.0072 (17)           | 167 (2)                 |
| O10—H10D···O8 <sup>vii</sup>  | 0.82 (2)    | 2.07 (2)      | 2.8885 (17)           | 175 (2)                 |
| O11—H11D···O2                 | 0.845(15)   | 1.951(16)     | 2.7521(17)            | 157.9(19)               |
| O11—H11C···O8 <sup>vi</sup>   | 0.83 (1)    | 1.99 (1)      | 2.8213 (17)           | 172 (2)                 |
| O12—H12A···O3                 | 0.82 (2)    | 2.09 (2)      | 2.9075 (16)           | 173 (2)                 |
| O12—H12B···O4 <sup>viii</sup> | 0.82 (2)    | 2.04 (2)      | 2.8514 (16)           | 174 (2)                 |

Symmetry codes: (iii)  $x, y+1, z$ ; (iv)  $-x+2, -y+2, -z+1$ ; (v)  $x, y-1, z$ ; (vi)  $-x+1, -y+1, -z+1$ ; (vii)  $-x+1, -y+2, -z+1$ ; (viii)  $-x+2, -y+1, -z+1$ .

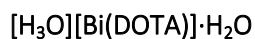

### Refinement

The carboxylate arm is disordered and refined to occupancies of 76.5% for the major component and 23.5% for the minor component. The atoms of the minor component were refined isotropically.

The more difficult problem in this structure is the assignment of the remaining electron density and deriving a charge-balanced model. Assuming the Bi is in the +III state, charge balance requires one of the following: (a) one carboxylate group is not deprotonated; (b) there is one H<sub>3</sub>O<sup>+</sup> per [Bi(DOTA)]<sup>-</sup> ion; or (c) there is a Na<sup>+</sup> ion present, as in the Na[Bi(DOTA)]·4H<sub>2</sub>O complex. Given the 4-fold symmetry and the disorder, it is not possible to detect whether or not there is a proton on the DOTA<sup>-</sup>, though this seems not unreasonable at pH 2 and is also consistent with the 74:26 disorder of the carboxylate arms.

The region of electron density near the axis could be disordered water/H<sub>3</sub>O<sup>+</sup> or disordered Na<sup>+</sup>. The disorder means it is not clear from the O...X distances whether X is water/H<sub>3</sub>O<sup>+</sup> or Na<sup>+</sup> – quite short H-bonds or quite long O...Na bonds are both possible. If this electron density is modelled as oxygen, disordered 50:50 on either side of the rotation-inversion axis (the coincident 2-fold rotation axis is more obvious), it will refine anisotropically and the residual electron density is low. Also, there are 3 small areas of electron density in approximately the right positions for 3 H atoms. Fitting this as 2 half-occupancy H<sub>3</sub>O<sup>+</sup> ions would give 2[H<sub>3</sub>O]<sup>+</sup> per [Bi(DOTA)]<sup>-</sup> i.e. incorrect charge – so it has been modelled as ½(H<sub>5</sub>O<sub>2</sub>), i.e. one H<sub>2</sub>O and one H<sub>3</sub>O<sup>+</sup> per bismuth ion.

Replacing the H<sub>3</sub>O<sup>+</sup>/H<sub>2</sub>O with 0.25 occupancy Na<sup>+</sup> (appropriate occupancy for charge balance) gave a less satisfactory model (R1 1.47% with higher residual electron density, and the Na does not refine anisotropically without severe restraints). The fit might perhaps be improved by disordering a partial-occupancy water molecule on top of the Na – but that seems unjustifiably complex.

So, on balance, [H<sub>3</sub>O][Bi(DOTA)]·H<sub>2</sub>O seems like the best model, with the caveat that the location of the acidic proton is not certain.

The packing diagram (Figure S25) is reminiscent of the packing for the Na[Bi(DOTA)]·4H<sub>2</sub>O complexes (Figure S23), with the H<sub>3</sub>O<sup>+</sup>/H<sub>2</sub>O units playing a similar role to the hydrated sodium ion. Again, the [Bi(DOTA)]<sup>-</sup> ions are stacked into columns parallel to the c axis *via* CH...O hydrogen bonds, as shown in the main manuscript (Figure 6).



Further Figures

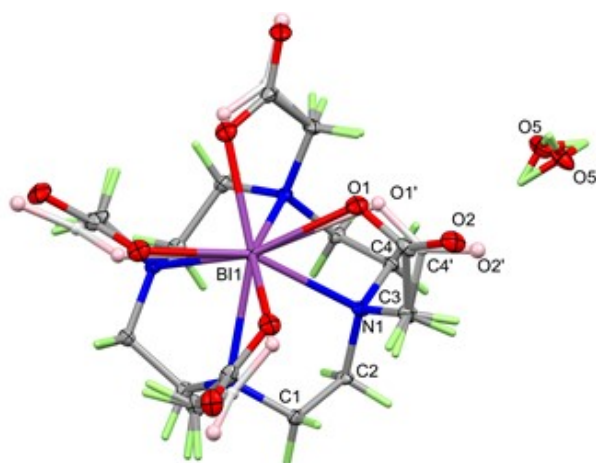

**Figure S24.**  $[\text{H}_3\text{O}][\text{Bi}(\text{DOTA})]\cdot\text{H}_2\text{O}$  showing disorder in the carboxylate groups and the  $\text{H}_3\text{O}^+/\text{H}_2\text{O}$  with 50% probability ellipsoids

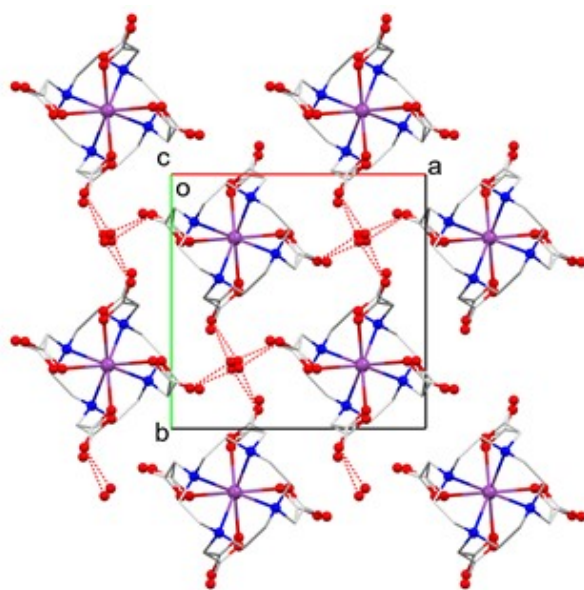

**Figure S25.** Packing diagram for  $[\text{H}_3\text{O}][\text{Bi}(\text{DOTA})]\cdot\text{H}_2\text{O}$  viewed down the  $c$  axis. Hydrogen bonds shown as dotted lines.

**Table S5.** Hydrogen-bond geometry (Å, °) for [H<sub>3</sub>O][Bi(DOTA)]·H<sub>2</sub>O

| <i>D</i> —H··· <i>A</i>                                   | <i>D</i> —H | H··· <i>A</i> | <i>D</i> ··· <i>A</i> | <i>D</i> —H··· <i>A</i> |
|-----------------------------------------------------------|-------------|---------------|-----------------------|-------------------------|
| C1—H1A···O2a <sup>iv</sup>                                | 0.99        | 2.65          | 3.589 (4)             | 159                     |
| C1—H1B···O2a <sup>v</sup>                                 | 0.99        | 2.42          | 3.381 (2)             | 162                     |
| C1—H1B···O1 <sup>b</sup>                                  | 0.99        | 2.56          | 3.094 (7)             | 114                     |
| C1—H1B···O2 <sup>b</sup> v                                | 0.99        | 2.40          | 3.385 (5)             | 171                     |
| C2—H2B···O1a <sup>iv</sup>                                | 0.99        | 2.59          | 3.228 (2)             | 122                     |
| C3a—H3Aa···O5 <sup>vi</sup>                               | 0.99        | 2.58          | 3.410 (6)             | 141                     |
| C3a—H3Ba···O2a <sup>vii</sup>                             | 0.99        | 2.60          | 3.575 (2)             | 167                     |
| C3 <sup>b</sup> —H3 <sup>b</sup> Bb···O1 <sup>b</sup> iii | 0.99        | 2.58          | 3.302 (7)             | 129                     |
| O5—H5A···O5 <sup>viii</sup>                               | 0.73 (2)    | 1.90 (2)      | 2.600 (4)             | 160 (1)                 |
| O5—H5A···O5 <sup>ix</sup>                                 | 0.73 (2)    | 1.90 (2)      | 2.600 (4)             | 160 (1)                 |
| O5—H5B···O2a                                              | 0.82 (2)    | 1.78 (2)      | 2.563 (8)             | 161 (3)                 |
| O5—H5B···O2 <sup>b</sup>                                  | 0.82 (2)    | 1.67 (2)      | 2.484 (9)             | 172 (3)                 |

Symmetry codes: (iii)  $-y+3/2, x, z$ ; (iv)  $x, y, z+1$ ; (v)  $-y+1, x-1/2, -z+1$ ; (vi)  $y+1/2, -x+1, -z+1$ ; (vii)  $-x+2, -y+1, -z+1$ ; (viii)  $y+1/2, -x+1, -z$ ; (ix)  $-y+1, x-1/2, -z$ .

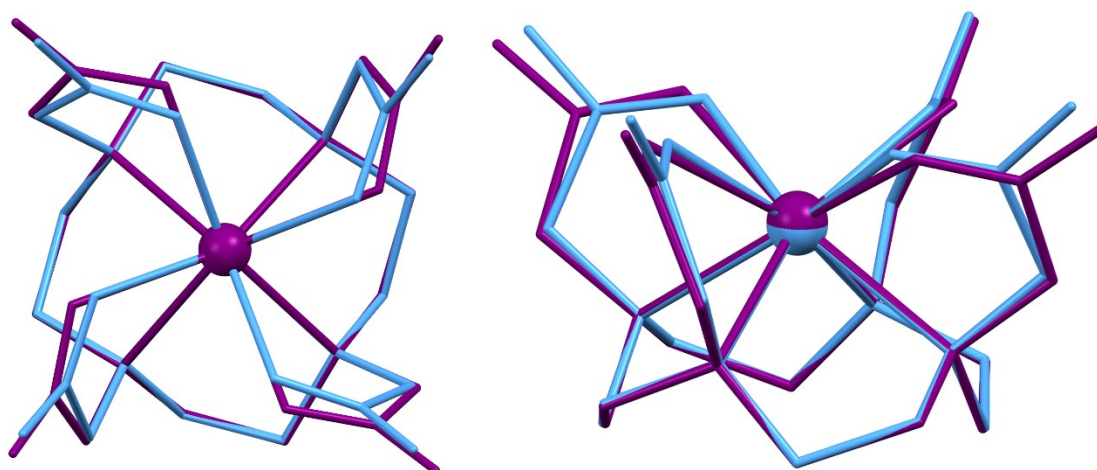**Figure S26.** Overlay of the structures of [Sc(DOTA)]<sup>-</sup> (pale blue from JOGZEM) and [Sb(DOTA)]<sup>-</sup> (purple) showing the different positions of the metal ions within the cavity. The four N atoms were used for the overlay mapping.

**Table S6.** Expanded version of table 1 with selected bond lengths (Å) for Na[Sb(DOTA)]·4H<sub>2</sub>O and Na[Bi(DOTA)]·4H<sub>2</sub>O, [H<sub>3</sub>O][Bi(dota)]·H<sub>2</sub>O and structures from literature containing [Sc(DOTA)]<sup>a</sup>.

| Na[Sb(DOTA)]·4H <sub>2</sub> O         |              | Na[Bi(DOTA)]·4H <sub>2</sub> O |              | [H <sub>3</sub> O][Bi(dota)]·H <sub>2</sub> O |             | 3(Na[Sc(DOTA)])<br>·NaOH·18H <sub>2</sub> O <sup>c</sup> |                        | K[Sc(dota)][H <sub>6</sub> dota]Cl <sub>2</sub> ·4H <sub>2</sub> O <sup>d</sup> |            |
|----------------------------------------|--------------|--------------------------------|--------------|-----------------------------------------------|-------------|----------------------------------------------------------|------------------------|---------------------------------------------------------------------------------|------------|
| Sb1—O1                                 | 2.5011 (10)  | Bi1—O1                         | 2.4993 (11)  | Bi1—O1                                        | 2.439 (3)   | Sc1—O1                                                   | 2.151(2)               | Sc1—O51A                                                                        | 2.2228(15) |
| Sb1—O3                                 | 2.5971 (10)  | Bi1—O3                         | 2.5715 (11)  |                                               |             | Sc2—O3                                                   | 2.147(2)               |                                                                                 |            |
| Sb2—O5                                 | 2.5146 (10)  | Bi2—O5                         | 2.5012 (11)  |                                               |             | Sc3—O5                                                   | 2.163(2)               |                                                                                 |            |
| Sb2—O7                                 | 2.6929 (11)  | Bi2—O7                         | 2.6336 (11)  |                                               |             |                                                          |                        |                                                                                 |            |
| Sb1—N1                                 | 2.4563 (11)  | Bi1—N1                         | 2.5288 (13)  | Bi1—N1                                        | 2.5396 (11) | Sc1—N1                                                   | 2.441(2)               | Sc1—N1A                                                                         | 2.4100(17) |
| Sb1—N2                                 | 2.4453 (11)  | Bi1—N2                         | 2.5170 (12)  |                                               |             | Sc2—N2                                                   | 2.446(3)               |                                                                                 |            |
| Sb2—N3                                 | 2.4421 (12)  | Bi2—N3                         | 2.5256 (13)  |                                               |             | Sc3—N3                                                   | 2.450(2)               |                                                                                 |            |
| Sb2—N4                                 | 2.4277 (11)  | Bi2—N4                         | 2.5034 (12)  |                                               |             |                                                          |                        |                                                                                 |            |
|                                        |              |                                |              |                                               |             |                                                          |                        |                                                                                 |            |
| M—N <sub>4</sub><br>plane <sup>b</sup> | 1.340, 1.333 |                                | 1.423, 1.429 |                                               | 1.450       |                                                          | 1.327,<br>1.336, 1.330 |                                                                                 | 1.300      |
| M—O <sub>4</sub><br>plane <sup>b</sup> | 1.155, 1.162 |                                | 1.113, 1.106 |                                               | 1.116       |                                                          | 1.007,<br>0.989, 1.019 |                                                                                 | 1.172      |
|                                        |              |                                |              |                                               |             |                                                          |                        |                                                                                 |            |
| Na1—O6                                 | 2.3483 (12)  | Na1—O6                         | 2.3531 (13)  |                                               |             |                                                          |                        |                                                                                 |            |
| Na1—O9                                 | 2.3074 (13)  | Na1—O9                         | 2.3093 (13)  |                                               |             |                                                          |                        |                                                                                 |            |
| Na1—O10                                | 2.3653 (12)  | Na1—O10                        | 2.3705 (13)  |                                               |             |                                                          |                        |                                                                                 |            |
| Na1—O11                                | 2.6005 (13)  | Na1—O11                        | 2.6204 (14)  |                                               |             |                                                          |                        |                                                                                 |            |
| Na1—O12                                | 2.3341 (12)  | Na1—O12                        | 2.3383 (13)  |                                               |             |                                                          |                        |                                                                                 |            |

<sup>a</sup>In the case of disordered structures, values are quoted for the major component.

<sup>b</sup>Distance of the metal ion from the mean plane of the N<sub>4</sub> or O<sub>4</sub> donors.

<sup>c</sup>F. Benetollo, G. Bombieri, L. Calabi, S. Aime, M. Botta, *Inorg. Chem.* **2003**, 42, 148 (REFCODE: LUQCIJ) Note that the macrocyclic ring conformation in this complex is different from all the other complexes discussed in this paper.

<sup>d</sup>M. Pniok, V. Kubicek, J. Havlickova, J. Kotek, A. Sabatie-Gogova, J. Plutnar, S. Huclier-Markai, P. Hermann, *Chem. Eur. J.* **2014**, 20, 7944 (REFCODE: JOGZEM)
